# Supplementary material for: Multi-functionalization of Rh-carbynoids with alcohols/carbamates and α-propargylic-3-indolymethanols
Source: Royal Society of Chemistry journal article supplement (doi:10.1039/d4qo00401a), 2024-01-01
Supplement: d4qo00401a1.pdf [file d4qo00401a1.pdf]

## Supporting Information

### **Multifunctionalization of Rh-carbynoids with Alcohol/carbamate and $\alpha$ -Propargylic-3-indolymethanol**

Jian Luo, Mengchu Zhang, Gengxin Liu, Zhonghui Zhang, Yu Qian and Wenhao Hu\*,  
Guangdong Provincial Key Laboratory of Chiral Molecule and Drug Discovery, School  
of Pharmaceutical Sciences, Sun Yat-sen University, Guangzhou 510006, China.

Email: huwh9@mail.sysu.edu.cn

|                                                                                                              |     |
|--------------------------------------------------------------------------------------------------------------|-----|
| 1. General Information                                                                                       | S2  |
| 2. Experimental Procedures                                                                                   | S3  |
| 3. References                                                                                                | S4  |
| 4. Preliminary Results of Optimizing Asymmetric Reaction Conditions                                          | S5  |
| 5. NMR, HRMS(ESI) Data for Compounds <b>4</b> , <b>5a</b> , <b>6a</b>                                        | S6  |
| 6. Four-component Trifunctionalization Reaction Using Different Nucleophiles                                 | S14 |
| 7. Procedures for Scale up and Derivations                                                                   | S15 |
| 8. X-Ray Crystallographic Data for Product <b>4s</b>                                                         | S17 |
| 9. Copies of <sup>1</sup> H NMR and <sup>13</sup> C NMR Spectra of Products <b>4</b> , <b>5a</b> , <b>6a</b> | S18 |
| 10. Copies of HPLC Spectra of Products <b>4a</b> , <b>4s</b>                                                 | S39 |

## 1. General Information

All reactions were carried out in oven-dried glassware. Flash column chromatography was performed using silica gel (300-400 mesh). Analytical thin-layer chromatography was performed using glass plates pre-coated with 200-300 mesh silica gel impregnated with a fluorescent indicator (254 nm).  $^1\text{H}$  NMR and  $^{13}\text{C}$  NMR spectra were recorded in  $\text{CDCl}_3$  or  $\text{DMSO}-d_6$  on a 500/400 MHz spectrometer; chemical shifts were reported in ppm with the solvent signal as reference, and coupling constants ( $J$ ) were given in Hertz. The peak information was described as: br = broad, s = singlet, d = doublet, t = triplet, q = quartet, m = multiplet, comp = composite. Enantioselectivity was determined on HPLC using Chiralpak IA, and OD-H column. High-resolution mass spectra (HRMS) were recorded on a commercial apparatus (ESI Source) and (CI Source).

Anhydrous solvents, acids (including racemic phosphoric acid) and 4 Å molecular sieve were purchased from *Energy Chemical*. Chiral phosphoric acids were purchased from *Daicel*. Unless otherwise stated, all purchased reagents were used without further purification. 4 Å molecular sieve was dried in a Muffle furnace at 250 °C over 8 h. Hypervalent iodine reagent<sup>[1]</sup> and 3-indolymethanol<sup>[2]</sup> were prepared using the literature procedures.

## 2. Experimental procedures

### A: General procedure for optimization of conditions

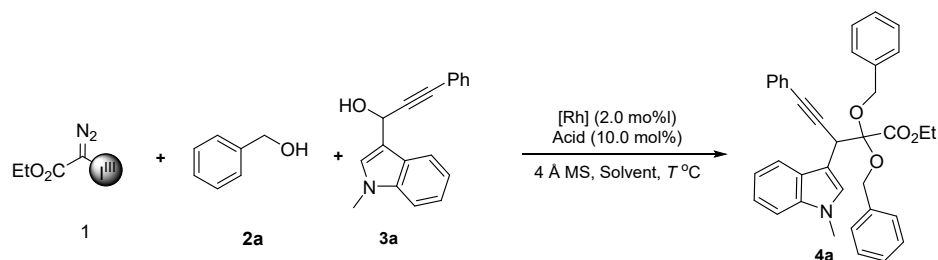

The reactions were conducted on a 0.1 mmol scale: to a mixture of metal catalyst (2.0 mol %), acid catalyst (10.0 mol %), alcohol **2a** (0.40 mmol),  $\alpha$ -propargylic-3-indolymethanol **3a** (0.1 mmol) and 4 Å MS (150 mg) in solvent (2.0 mL) was added diazo compound **1** (0.15 mmol) at indicated temperature, and the reaction was running for 2 h under these conditions. The solution was then concentrated in vacuum. And the residue was purified by column chromatography on silica gel (eluent: EtOAc/light petroleum ether = 1/10) to give the product **4a**.

### B: General procedure for the preparation of products **4**

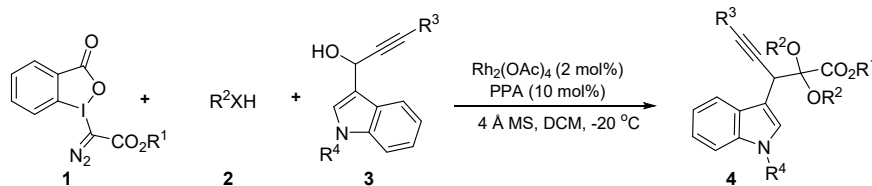

The reactions were conducted on a 0.1 mmol scale: to a solution of  $\text{Rh}_2(\text{OAc})_4$  (0.9 mg, 2.0 mol %), phosphoric acid (3.5 mg, 10.0 mol %), alcohol **2** (0.4 mmol), and 4 Å MS (150 mg) in DCM (1.0 mL) was added a solution of diazo compound **1** (0.15 mmol) and  $\alpha$ -propargylic-3-indolymethanol **3** (0.1 mmol), in DCM (3.0 mL) via a syringe pump in 1 h under an argon atmosphere at indicate temperature. After completion of the addition, stirring was continued at indicate temperature for 0.5 h. The solution was concentrated in vacuum. And then the residue was purified by column chromatography on silica gel (eluent: EtOAc/light petroleum ether = 1/10-1/6) to give the product **4**.

### 3. References

- [1] a) Wang, Z.; Herraiz, A. G.; Del Hoyo, A. M.; Suero, M. G. Generating carbyne equivalents with photoredox catalysis. *Nature* **2018**, 554, 86; b) Weiss, R.; Seubert, J.; Hampel, F. D-Aryliodonio diazo compounds: SN reactions at the  $\alpha$ -C atom as a novel reaction type for diazo compounds. *Angew. Chem. Int. Ed.* **1994**, 33, 1952.
- [2] a) Li, X.; Sun, J. *Angew. Chem. Int. Ed.* **2020**, 59, 17049-17054; b) Yue, C.; Na, F.; Fang, X.; Cao, Y.; Antilla, J. *Angew. Chem. Int. Ed.* **2018**, 57, 11004-11008.

## 4. Preliminary Results of Optimizing Asymmetric Reaction Conditions

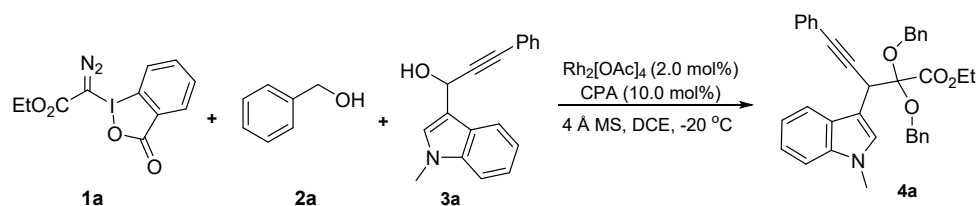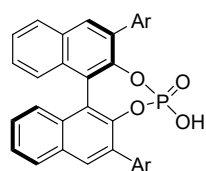

CPA 1: Ar = 2,4,6- $(i\text{Pr})_3\text{C}_6\text{H}_2$   
 CPA 2: Ar = 2,4,6- $(\text{Me})_3\text{C}_6\text{H}_2$   
 CPA 3: Ar = 2,4,6- $(\text{cy})_3\text{C}_6\text{H}_2$   
 CPA 4: Ar = 9-Phenanthryl  
 CPA 5: Ar = 9-anthryl  
 CPA 6: Ar = 1-pyreyl  
 CPA 7: Ar = 1-naphthyl  
 CPA 8: Ar = 2-naphthyl

CPA 9: Ar =  $\text{Si}(\text{Ph})_3$   
 CPA 10: Ar = 3,5- $(\text{Me})_2\text{PC}_6\text{H}_3$   
 CPA 11: Ar = 3,5- $(t\text{Bu})_2\text{C}_6\text{H}_3$   
 CPA 12: Ar = 3,5- $(\text{CF}_3)_2\text{C}_6\text{H}_3$   
 CPA 13: Ar = 4- $t\text{BuPhC}_6\text{H}_4$   
 CPA 14: Ar = 4- $\text{CF}_3\text{PhC}_6\text{H}_4$   
 CPA 15: Ar = 4- $\text{OMePhC}_6\text{H}_4$

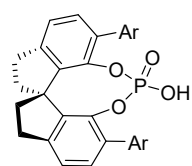

CPA 16: Ar = 2,4,6- $(i\text{Pr})_3\text{C}_6\text{H}_2$   
 CPA 17: Ar = 2,4,6- $(\text{Me})_3\text{C}_6\text{H}_2$   
 CPA 18: Ar = 9-Phenanthryl  
 CPA 19: Ar = 9-anthryl  
 CPA 20: Ar = 1-pyreyl  
 CPA 21: Ar =  $\text{Si}(\text{Ph})_3$   
 CPA 22: Ar = 3,5- $(\text{Me})_2\text{PC}_6\text{H}_3$   
 CPA 23: Ar = 3,5- $(t\text{Bu})_2\text{C}_6\text{H}_3$

CPA 24: Ar = 3,5- $(\text{CF}_3)_2\text{C}_6\text{H}_3$   
 CPA 25: Ar = 4- $t\text{BuPhC}_6\text{H}_4$   
 CPA 26: Ar = 4- $\text{CF}_3\text{PhC}_6\text{H}_4$

| Entry <sup>[a]</sup> | CPA    | Yield (%) <sup>[b]</sup> | Ee (%) <sup>[c]</sup> |
|----------------------|--------|--------------------------|-----------------------|
| 1                    | CPA 1  | 41                       | 8                     |
| 2                    | CPA 2  | 45                       | 0                     |
| 3                    | CPA 3  | 40                       | 20                    |
| 4                    | CPA 4  | 47                       | 20                    |
| 5                    | CPA 5  | 45                       | 2                     |
| 6                    | CPA 6  | 42                       | 20                    |
| 7                    | CPA 7  | 40                       | 0                     |
| 8                    | CPA 8  | 45                       | 0                     |
| 9                    | CPA 9  | 41                       | 8                     |
| 10                   | CPA 10 | 46                       | 0                     |
| 11                   | CPA 11 | 43                       | 8                     |
| 12                   | CPA 12 | 46                       | 8                     |
| 13                   | CPA 13 | 43                       | 0                     |
| 14                   | CPA 14 | 40                       | 4                     |
| 15                   | CPA 15 | 45                       | 0                     |
| 16                   | CPA 16 | 42                       | 0                     |
| 17                   | CPA 17 | 46                       | 6                     |
| 18                   | CPA 18 | 44                       | 22                    |
| 19                   | CPA 19 | 40                       | 8                     |
| 20                   | CPA 20 | 43                       | 54                    |
| 21                   | CPA 21 | 41                       | 0                     |
| 22                   | CPA 22 | 45                       | 8                     |
| 23                   | CPA 23 | 45                       | 8                     |
| 24                   | CPA 24 | 41                       | 0                     |
| 25                   | CPA 25 | 46                       | 0                     |
| 26                   | CPA 26 | 45                       | 0                     |

<sup>a</sup>The reactions were conducted on a 0.1 mmol scale: to a solution of Rh<sub>2</sub>(OAc)<sub>4</sub> (2.0 mol%), chiral phosphoric acid (10 mol%), **2a** (0.40 mmol), and 4 Å MS (150 mg) in DCE (1.0 mL) was added a solution of **1a** (0.15 mmol) and **3a** (0.1 mmol), in DCE (3.0 mL) via a syringe pump in 1 h under an argon atmosphere at -20 °C, and the reaction was running for 0.5 h under these conditions. <sup>b</sup>Isolated yield. <sup>c</sup>enantiomeric excess were determined by chiral high performance liquid chromatography (HPLC) analysis.

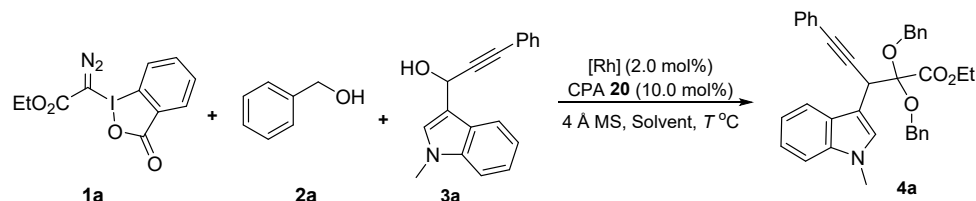

| Entry <sup>[a]</sup> | Rh                                 | Solvent | T/°C | Yield (%) <sup>[b]</sup> | Ee (%) <sup>[c]</sup> |
|----------------------|------------------------------------|---------|------|--------------------------|-----------------------|
| 1                    | Rh <sub>2</sub> (OAc) <sub>4</sub> | DCM     | -20  | 55                       | 54                    |
| 2                    | Rh <sub>2</sub> (OAc) <sub>4</sub> | EA      | -20  | NR                       | --                    |
| 3                    | Rh <sub>2</sub> (OAc) <sub>4</sub> | THF     | -20  | NR                       | --                    |
| 4                    | Rh <sub>2</sub> (OAc) <sub>4</sub> | DCM     | 0    | 52                       | 54                    |
| 5                    | Rh <sub>2</sub> (OAc) <sub>4</sub> | DCM     | 25   | 40                       | 54                    |
| 6                    | Rh <sub>2</sub> (OAc) <sub>4</sub> | DCM     | -30  | 32                       | 53                    |
| 7                    | Rh <sub>2</sub> (Oct) <sub>4</sub> | DCM     | -20  | 52                       | 54                    |
| 8                    | Rh <sub>2</sub> (esp) <sub>2</sub> | DCM     | -20  | 45                       | 54                    |

<sup>a</sup>The reactions were conducted on a 0.1 mmol scale: to a solution of [Rh] (2.0 mol%), chiral phosphoric acid **20** (10 mol%), **2a** (0.40 mmol), and 4 Å MS (150 mg) in solvent (1.0 mL) was added a solution of **1a** (0.15 mmol) and **3a** (0.1 mmol), in same solvent (3.0 mL) via a syringe pump in 1 h under an argon atmosphere at indicated temperature, and the reaction was running for 0.5 h under these conditions. <sup>b</sup>Isolated yield. <sup>c</sup>enantiomeric excess were determined by chiral high performance liquid chromatography (HPLC) analysis.

## 5. NMR, HRMS(ESI) Data for Compounds **4**, **5a**, **6a**

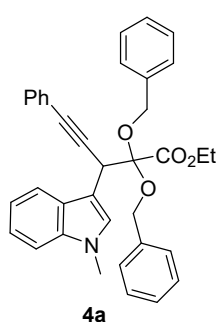

ethyl 2,2-bis(benzyloxy)-3-(1-methyl-1H-indol-3-yl)-5-phenylpent-4-ynoate (**4a**). Yellow oil, 44.5 mg, 82% yield. <sup>1</sup>H NMR (500 MHz, CDCl<sub>3</sub>): δ 1.04 (t, *J* = 7.1 Hz, 3H), 3.70 (s, 3H), 3.93-4.07 (m, 2H), 4.76-4.86 (m, 2H), 4.94 (d, *J* = 11.9 Hz, 1H), 5.09 (d, *J* = 10.1 Hz, 2H), 7.07 (t, *J* = 7.4 Hz, 1H), 7.18-7.21 (m, 2H), 7.25-7.35 (m, 12H), 7.42-7.45 (m, 4H), 7.85 (d, *J* = 8.0 Hz, 1H); <sup>13</sup>C NMR (125 MHz, CDCl<sub>3</sub>): δ 167.74, 138.03, 137.90, 136.68, 131.51, 128.91, 128.23, 128.15, 128.14, 127.79, 127.38, 127.36, 127.33, 127.25, 123.71, 121.49, 120.13, 118.99, 109.05, 108.62, 102.84, 88.03, 83.96, 66.12, 65.58, 61.48, 37.22, 32.76, 13.80. HRMS (TOF MS ESI<sup>+</sup>) calculated for C<sub>36</sub>H<sub>33</sub>NO<sub>4</sub>Na [M+Na]<sup>+</sup>: 566.2302, Found: 566.2302.

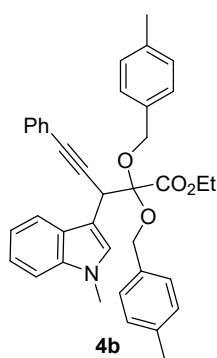

ethyl 3-(1-methyl-1H-indol-3-yl)-2,2-bis((4-methylbenzyl)oxy)-5-phenylpent-4-ynoate (**4b**). Yellow oil, 47.5 mg, 83% yield.  $^1\text{H}$  NMR (500 MHz,  $\text{CDCl}_3$ ):  $\delta$  1.02 (t,  $J = 7.1$  Hz, 3H), 2.32 (s, 6H), 3.70 (s, 3H), 3.89-4.03 (m, 2H), 4.69 (d,  $J = 11.6$  Hz, 1H), 4.77 (d,  $J = 11.6$  Hz, 1H), 4.86 (d,  $J = 11.6$  Hz, 1H), 5.02 (d,  $J = 10.5$  Hz, 2H), 7.05 (t,  $J = 7.5$  Hz, 1H), 7.10 (t,  $J = 7.9$  Hz, 4H), 7.16-7.23 (m, 5H), 7.24-7.26 (m, 3H), 7.31 (d,  $J = 7.7$  Hz, 2H), 7.39-7.40 (m, 2H), 7.82 (d,  $J = 8.0$  Hz, 1H);  $^{13}\text{C}$  NMR (125 MHz,  $\text{CDCl}_3$ ):  $\delta$  167.82, 137.01, 136.99, 136.69, 135.04, 134.92, 131.55, 128.92, 128.85, 128.13, 127.75, 127.49, 127.44, 127.42, 123.82, 121.47, 120.20, 118.98, 109.04, 108.74, 102.79, 88.14, 83.90, 66.02, 65.45, 61.43, 37.23, 32.81, 29.68, 21.16, 13.82. HRMS (TOF MS  $\text{ESI}^+$ ) calculated for  $\text{C}_{38}\text{H}_{37}\text{NO}_4\text{Na}$  [ $\text{M}+\text{Na}$ ] $^+$ : 594.2615, Found: 596.2610.

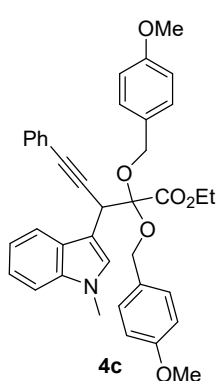

ethyl 2,2-bis((4-methoxybenzyl)oxy)-3-(1-methyl-1H-indol-3-yl)-5-phenylpent-4-ynoate (**4c**). Yellow oil, 51.3 mg, 85% yield.  $^1\text{H}$  NMR (500 MHz,  $\text{CDCl}_3$ ):  $\delta$  1.06 (t,  $J = 7.1$  Hz, 3H), 3.74 (s, 3H), 3.81 (s, 6H), 3.93-4.08 (m, 2H), 4.70 (d,  $J = 11.4$  Hz, 1H), 4.77 (d,  $J = 11.4$  Hz, 1H), 4.87 (d,  $J = 11.4$  Hz, 1H), 5.03 (d,  $J = 11.4$  Hz, 1H), 5.05 (s, 1H), 6.87 (t,  $J = 8.1$  Hz, 4H), 7.08 (t,  $J = 7.4$  Hz, 1H), 7.19-7.22 (m, 2H), 7.27-7.30 (m, 6H), 7.38 (d,  $J = 8.4$  Hz, 2H), 7.43-7.44 (m, 2H), 7.84 (d,  $J = 8.0$  Hz, 1H);  $^{13}\text{C}$  NMR (125 MHz,  $\text{CDCl}_3$ ):  $\delta$  167.82, 159.03, 158.99, 136.71, 131.55, 130.21, 130.10, 128.99, 128.93, 128.90, 128.14, 127.77, 127.44, 123.80, 121.48, 120.25, 118.97, 113.68, 113.59, 109.04, 108.77, 102.82, 88.12, 83.90, 65.89, 65.28, 61.44, 55.27, 37.26, 32.82, 13.84. HRMS (TOF MS  $\text{ESI}^+$ ) calculated for  $\text{C}_{38}\text{H}_{37}\text{NO}_6\text{Na}$  [ $\text{M}+\text{Na}$ ] $^+$ : 626.2513, Found: 626.2504.

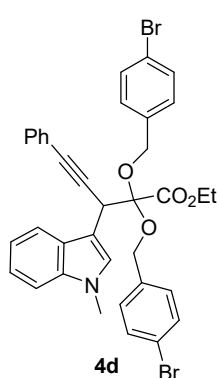

ethyl 2,2-bis((4-bromobenzyl)oxy)-3-(1-methyl-1H-indol-3-yl)-5-phenylpent-4-ynoate (**4d**). Yellow oil, 52.4 mg, 75% yield.  $^1\text{H}$  NMR (500 MHz,  $\text{CDCl}_3$ ):  $\delta$  1.07 (t,  $J = 7.1$  Hz, 3H), 3.74 (s, 3H), 3.96-4.10 (m, 2H), 4.71 (d,  $J = 12.2$  Hz, 1H), 4.75 (d,  $J = 12.2$  Hz, 1H), 4.83 (d,  $J = 12.2$  Hz, 1H), 4.98 (d,  $J = 12.2$  Hz, 1H), 5.04 (s, 1H), 7.08 (t,  $J = 7.4$  Hz, 1H), 7.15-7.18 (m, 3H), 7.22 (t,  $J = 7.6$  Hz, 1H), 7.28-7.31 (m, 6H), 7.41-7.44 (m, 6H), 7.81 (d,  $J = 8.0$  Hz, 1H);  $^{13}\text{C}$  NMR (125 MHz,  $\text{CDCl}_3$ ):  $\delta$  167.56, 136.97, 136.88, 136.75, 131.50, 131.36, 131.27, 128.91, 128.89, 128.82, 128.25, 128.00, 127.31, 123.50, 121.66, 121.27, 121.23, 120.12, 119.11, 109.17, 108.50, 103.05, 87.63, 84.14, 65.61, 65.03, 61.67, 37.24, 32.85, 13.85. HRMS (TOF MS  $\text{ESI}^+$ ) calculated for  $\text{C}_{36}\text{H}_{31}\text{Br}_2\text{NO}_4\text{Na}$  [ $\text{M}+\text{Na}$ ] $^+$ : 722.0512, Found: 722.0510.

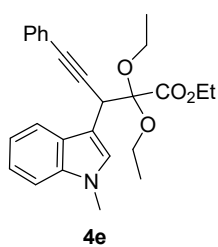

ethyl 2,2-diethoxy-3-(1-methyl-1H-indol-3-yl)-5-phenylpent-4-ynoate (**4e**). Yellow oil, 33.5 mg, 80% yield.  $^1\text{H}$  NMR (500 MHz,  $\text{CDCl}_3$ ):  $\delta$  1.05 (t,  $J = 7.1$  Hz, 3H), 1.24 (t,  $J = 7.0$  Hz, 3H), 1.34 (t,  $J = 7.0$  Hz, 3H), 3.57-3.63 (m, 1H), 3.71-3.77- 3.70 (m, 4H), 3.84-3.91 (m, 1H), 3.93-3.99 (m, 1H), 4.02-4.09 (m, 2H), 4.89 (s, 1H), 7.10 (t,  $J = 7.4$  Hz, 1H), 7.17-7.21 (m, 2H), 7.25-7.29 (m, 4H), 7.41-7.42 (m, 2H), 7.84 (d,  $J = 8.0$  Hz, 1H);  $^{13}\text{C}$  NMR (125 MHz,  $\text{CDCl}_3$ ):  $\delta$  168.21, 136.69, 131.53, 128.63, 128.08, 127.67, 127.52, 123.88, 121.41, 120.09, 118.87, 109.10, 109.03, 102.43, 88.14, 83.47, 61.31, 59.61, 59.01, 37.12, 32.82, 15.51, 15.25, 13.86. HRMS (TOF MS ESI $^+$ ) calculated for  $\text{C}_{26}\text{H}_{29}\text{NO}_4\text{Na}$   $[\text{M}+\text{Na}]^+$ : 442.1989, Found: 442.1986.

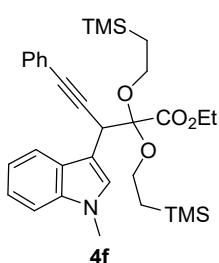

ethyl 3-(1-methyl-1H-indol-3-yl)-5-phenyl-2,2-bis(2-(trimethylsilyl)ethoxy)pent-4-ynoate (**4f**). Yellow oil, 46.7 mg, 83% yield.  $^1\text{H}$  NMR (500 MHz,  $\text{CDCl}_3$ ):  $\delta$  0.05 (s, 9H), 0.08 (s, 9H), 1.03 (t,  $J = 8.0$  Hz, 3H), 1.10 (t,  $J = 7.1$  Hz, 4H), 3.64-3.69 (m, 1H), 3.79-3.84 (m, 1H), 3.80 (s, 3H), 3.94-4.03 (m, 2H), 4.05-4.14 (m, 2H), 4.92 (s, 1H), 7.14 (t,  $J = 7.5$  Hz, 1H), 7.24 (t,  $J = 7.5$  Hz, 1H), 7.30-7.31 (m, 5H), 7.44-7.46 (m, 2H), 7.87 (d,  $J = 8.0$  Hz, 1H);  $^{13}\text{C}$  NMR (125 MHz,  $\text{CDCl}_3$ ):  $\delta$  167.74, 138.03, 137.90, 136.68, 131.51, 128.91, 128.23, 128.15, 128.14, 127.79, 127.38, 127.36, 127.33, 127.25, 123.71, 121.49, 120.13, 118.99, 109.05, 108.62, 102.84, 88.03, 83.96, 66.12, 65.58, 61.48, 37.22, 32.76, 13.80. HRMS (TOF MS ESI $^+$ ) calculated for  $\text{C}_{32}\text{H}_{45}\text{NO}_4\text{Si}_2\text{Na}$   $[\text{M}+\text{Na}]^+$ : 586.2780, Found: 586.2776.

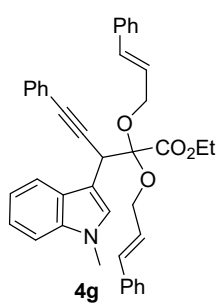

ethyl 2,2-bis(cinnamyloxy)-3-(1-methyl-1H-indol-3-yl)-5-phenylpent-4-ynoate (**4g**). Yellow oil, 44.6 mg, 75% yield.  $^1\text{H}$  NMR (500 MHz,  $\text{CDCl}_3$ ):  $\delta$  1.08 (t,  $J = 7.1$  Hz, 3H), 3.75 (s, 3H), 3.97-4.11 (m, 2H), 4.33-4.37 (m, 1H), 4.44-4.48 (m, 1H), 4.61-4.65 (m, 1H), 4.71-4.75 (m, 1H), 5.02 (s, 1H), 6.28-6.33 (m, 1H), 6.39-6.44 (m, 1H), 6.64 (d,  $J = 15.9$  Hz, 1H), 6.72 (d,  $J = 15.9$  Hz, 1H), 7.12 (t,  $J = 7.5$  Hz, 1H), 7.19-7.25 (m, 4H), 7.27-7.29 (m, 6H), 7.30-7.31 (m, 3H), 7.33-7.34 (m, 3H), 7.44-7.46 (m, 2H), 7.88 (d,  $J = 8.0$  Hz, 1H);  $^{13}\text{C}$  NMR (125 MHz,  $\text{CDCl}_3$ ):  $\delta$  167.89, 136.81, 136.79, 136.74, 131.69, 131.61, 128.87, 128.48, 128.16, 127.83, 127.53, 127.46, 126.48, 126.45, 125.78, 125.46, 123.71, 121.56, 120.02, 119.10, 109.15, 108.79, 102.59, 88.01, 83.97, 64.96, 64.54, 61.62, 37.33, 32.89, 13.89. HRMS (TOF MS ESI $^+$ ) calculated for  $\text{C}_{40}\text{H}_{37}\text{NO}_4\text{Na}$   $[\text{M}+\text{Na}]^+$ : 618.2615, Found: 618.2610.



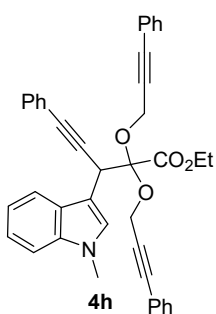

ethyl 3-(1-methyl-1H-indol-3-yl)-5-phenyl-2,2-bis((3-phenylprop-2-yn-1-yl)oxy)pent-4-ynoate (**4h**). Yellow oil, 43.7 mg, 74% yield.  $^1\text{H NMR}$  (500 MHz,  $\text{CDCl}_3$ ):  $\delta$  1.07 (t,  $J = 7.1$  Hz, 3H), 3.75 (s, 3H), 3.95-4.01 (m, 1H), 4.04-4.10 (m, 1H), 4.68-4.76 (m, 2H), 4.93-5.01 (m, 2H), 5.02 (s, 1H), 7.12 (t,  $J = 7.5$  Hz, 1H), 7.21 (t,  $J = 7.5$  Hz, 1H), 7.25-7.32 (m, 10H), 7.35 (s, 1H), 7.42-7.47 (m, 6H), 7.88 (d,  $J = 8.0$  Hz, 1H);  $^{13}\text{C NMR}$  (125 MHz,  $\text{CDCl}_3$ ):  $\delta$  167.05, 136.69, 131.81, 131.68, 129.22, 128.40, 128.37, 128.21, 128.12, 127.89, 127.31, 123.53, 122.77, 122.71, 121.58, 119.93, 119.20, 109.15, 108.25, 102.69, 87.32, 86.06, 85.98, 85.28, 84.97, 84.38, 61.96, 53.85, 53.40, 37.19, 32.90, 13.79. HRMS (TOF MS  $\text{ESI}^+$ ) calculated for  $\text{C}_{40}\text{H}_{33}\text{NO}_4\text{Na}$  [ $\text{M}+\text{Na}$ ] $^+$ : 614.2302, Found: 614.2309.

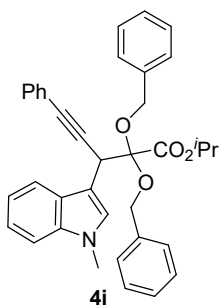

isopropyl 2,2-bis(benzyloxy)-3-(1-methyl-1H-indol-3-yl)-5-phenylpent-4-ynoate (**4i**). Yellow oil, 42.3 mg, 76% yield.  $^1\text{H NMR}$  (500 MHz,  $\text{CDCl}_3$ ):  $\delta$  0.93 (d,  $J = 6.3$  Hz, 3H), 1.05 (d,  $J = 6.2$  Hz, 3H), 3.71 (s, 3H), 4.75 (d,  $J = 11.9$  Hz, 1H), 4.82-4.89 (m, 2H), 4.92 (d,  $J = 12.0$  Hz, 1H), 5.05-5.08 (m, 2H), 7.06 (t,  $J = 7.5$  Hz, 1H), 7.17-7.20 (m, 2H), 7.23-7.34 (m, 12H), 7.40-7.44 (m, 4H), 7.84 (d,  $J = 8.0$  Hz, 1H);  $^{13}\text{C NMR}$  (125 MHz,  $\text{CDCl}_3$ ):  $\delta$  167.31, 138.14, 138.02, 136.69, 131.54, 128.92, 128.23, 128.14, 127.77, 127.53, 127.33, 127.31, 127.26, 123.77, 121.50, 120.34, 119.00, 108.98, 108.71, 102.71, 88.09, 83.97, 69.44, 66.11, 65.62, 37.14, 32.78, 21.48, 21.28. HRMS (TOF MS  $\text{ESI}^+$ ) calculated for  $\text{C}_{37}\text{H}_{35}\text{NO}_4\text{Na}$  [ $\text{M}+\text{Na}$ ] $^+$ : 580.2458, Found: 580.2450.

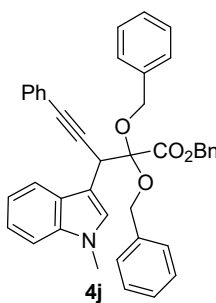

benzyl 2,2-bis(benzyloxy)-3-(1-methyl-1H-indol-3-yl)-5-phenylpent-4-ynoate (**4j**). Yellow oil, 47.2 mg, 78% yield.  $^1\text{H NMR}$  (500 MHz,  $\text{CDCl}_3$ ):  $\delta$  3.74 (s, 3H), 4.38-4.43 (m, 1H), 4.47-4.52 (m, 1H), 4.80 (d,  $J = 11.9$  Hz, 1H), 4.87 (d,  $J = 11.9$  Hz, 1H), 4.95 (d,  $J = 11.9$  Hz, 1H), 5.10-5.13 (m, 3H), 5.20-5.24 (m, 1H), 5.67-5.75 (m, 1H), 7.09 (t,  $J = 7.9$  Hz, 1H), 7.20-7.23 (m, 2H), 7.27-7.37 (m, 14H), 7.44-7.48 (m, 4H), 7.86 (d,  $J = 8.1$  Hz, 1H);  $^{13}\text{C NMR}$  (125 MHz,  $\text{CDCl}_3$ ):  $\delta$  167.44, 137.98, 137.86, 136.72, 131.57, 131.42, 129.00, 128.27, 128.19, 128.15, 127.82, 127.40, 127.38, 127.36, 127.33, 123.70, 121.52, 120.21, 119.04, 118.61, 109.09, 108.57, 103.04, 87.95, 84.02, 66.19, 66.04, 65.56, 37.30, 32.82. HRMS (TOF MS  $\text{ESI}^+$ ) calculated for  $\text{C}_{41}\text{H}_{35}\text{NO}_4\text{Na}$  [ $\text{M}+\text{Na}$ ] $^+$ : 628.2458, Found: 628.2455.

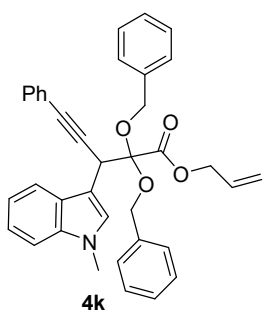

allyl 2,2-bis(benzyloxy)-3-(1-methyl-1H-indol-3-yl)-5-phenylpent-4-ynoate (**4k**). Yellow oil, 44.5 mg, 80% yield.  $^1\text{H}$  NMR (500 MHz,  $\text{CDCl}_3$ ):  $\delta$  3.63 (s, 3H), 4.74 (d,  $J = 11.8$  Hz, 1H), 4.81 (d,  $J = 11.8$  Hz, 1H), 4.90-4.94 (m, 2H), 5.02 (d,  $J = 12.4$  Hz, 1H), 5.08 (s, 1H), 5.11 (d,  $J = 11.8$  Hz, 1H), 7.03-7.06 (m, 2H), 7.11 (d,  $J = 7.4$  Hz, 2H), 7.17-7.20 (m, 3H), 7.23-7.24 (m, 3H), 7.27-7.32 (m, 8H), 7.37-7.39 (m, 2H), 7.43 (d,  $J = 7.2$  Hz, 2H), 7.82 (d,  $J = 8.0$  Hz, 1H);  $^{13}\text{C}$  NMR (125 MHz,  $\text{CDCl}_3$ ):  $\delta$  167.52, 137.91, 137.79, 136.74, 135.19, 131.59, 128.88, 128.28, 128.26, 128.25, 128.16, 128.13, 128.04, 127.81, 127.41, 127.39, 127.37, 127.35, 123.68, 121.53, 120.28, 119.06, 109.10, 108.55, 103.13, 87.87, 84.01, 67.10, 66.23, 65.49, 37.24, 32.75. HRMS (TOF MS  $\text{ESI}^+$ ) calculated for  $\text{C}_{37}\text{H}_{33}\text{NO}_4\text{Na}$  [ $\text{M}+\text{Na}$ ] $^+$ : 578.2302, Found: 578.2300.

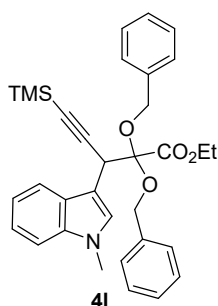

ethyl 2,2-bis(benzyloxy)-3-(1-methyl-1H-indol-3-yl)-5-(trimethylsilyl)pent-4-ynoate (**4l**). Yellow oil, 43.1 mg, 80% yield.  $^1\text{H}$  NMR (500 MHz,  $\text{CDCl}_3$ ):  $\delta$  0.16 (s, 9H), 1.04 (t,  $J = 7.1$  Hz, 3H), 3.70 (s, 3H), 3.89-4.03 (m, 2H), 4.70 (d,  $J = 12.0$  Hz, 1H), 4.80 (d,  $J = 12.0$  Hz, 1H), 4.87-4.89 (m, 2H), 5.03 (d,  $J = 12.1$  Hz, 1H), 7.03 (t,  $J = 7.5$  Hz, 1H), 7.10 (s, 1H), 7.17 (t,  $J = 7.3$  Hz, 1H), 7.22-7.24 (m, 2H), 7.28-7.35 (m, 7H), 7.41 (d,  $J = 7.2$  Hz, 2H), 7.77 (d,  $J = 8.0$  Hz, 1H);  $^{13}\text{C}$  NMR (125 MHz,  $\text{CDCl}_3$ ):  $\delta$  167.67, 138.16, 137.98, 136.65, 128.88, 128.54, 128.45, 128.37, 128.22, 128.15, 128.08, 127.95, 127.34, 127.32, 127.29, 127.20, 127.10, 121.46, 120.16, 118.87, 109.02, 108.24, 104.39, 102.48, 88.54, 65.95, 65.57, 61.48, 37.52, 32.80, 13.82. HRMS (TOF MS  $\text{ESI}^+$ ) calculated for  $\text{C}_{33}\text{H}_{37}\text{NO}_4\text{SiNa}$  [ $\text{M}+\text{Na}$ ] $^+$ : 562.2385, Found: 562.2382.

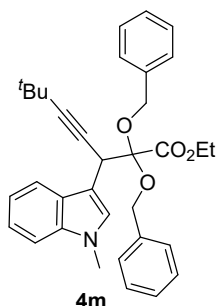

ethyl 2,2-bis(benzyloxy)-6,6-dimethyl-3-(1-methyl-1H-indol-3-yl)hept-4-ynoate (**4m**). Yellow oil, 39.7 mg, 76% yield.  $^1\text{H}$  NMR (500 MHz,  $\text{CDCl}_3$ ):  $\delta$  1.08 (t,  $J = 7.1$  Hz, 3H), 1.25 (s, 9H), 3.70 (s, 3H), 3.93-4.06 (m, 2H), 4.70 (d,  $J = 12.0$  Hz, 1H), 4.79 (d,  $J = 12.5$  Hz, 2H), 4.85 (d,  $J = 12.0$  Hz, 1H), 5.03 (d,  $J = 12.1$  Hz, 1H), 7.03 (t,  $J = 7.5$  Hz, 1H), 7.07 (s, 1H), 7.17 (t,  $J = 7.6$  Hz, 1H), 7.23-7.28 (m, 3H), 7.30-7.35 (m, 6H), 7.42 (d,  $J = 7.7$  Hz, 2H), 7.82 (d,  $J = 8.0$  Hz, 1H);  $^{13}\text{C}$  NMR (125 MHz,  $\text{CDCl}_3$ ):  $\delta$  167.93, 138.23, 138.19, 136.71, 128.78, 128.19, 128.09, 127.51, 127.28, 127.25, 127.21, 127.11, 121.32, 120.50, 118.69, 109.41, 108.93, 102.79, 92.16, 65.91, 65.45, 61.36, 36.60, 32.76, 30.97, 27.62, 13.87. HRMS (TOF MS  $\text{ESI}^+$ ) calculated for  $\text{C}_{34}\text{H}_{37}\text{NO}_4\text{Na}$  [ $\text{M}+\text{Na}$ ] $^+$ : 546.2615, Found: 546.2607.

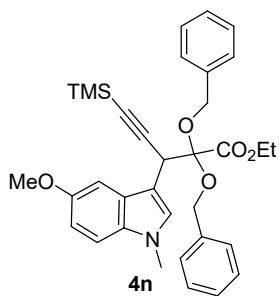

ethyl 2,2-bis(benzyloxy)-3-(5-methoxy-1-methyl-1H-indol-3-yl)-5-(trimethylsilyl)pent-4-ynoate (**4n**). Yellow oil, 46.1 mg, 81% yield.  $^1\text{H}$  NMR (500 MHz,  $\text{CDCl}_3$ ):  $\delta$  0.19 (s, 9H), 1.09 (t,  $J = 7.1$  Hz, 3H), 3.59 (s, 3H), 3.68 (s, 3H), 3.97-4.09 (m, 2H), 4.76 (d,  $J = 12.0$  Hz, 1H), 4.82-4.88 (m, 3H), 5.02 (d,  $J = 12.0$  Hz, 1H), 6.83 (dd,  $J = 8.8$ , 2.4 Hz, 1H), 7.04 (s, 1H), 7.13 (d,  $J = 8.8$  Hz, 1H), 7.22 (d,  $J = 2.4$  Hz, 1H), 7.25-7.35 (m, 8H), 7.43 (d,  $J = 7.2$  Hz, 2H);  $^{13}\text{C}$  NMR (125 MHz,  $\text{CDCl}_3$ ):  $\delta$  167.76, 153.66, 138.16, 138.06, 132.10, 129.31, 128.24, 128.16, 127.66, 127.37, 127.32, 127.28, 127.14, 112.24, 109.78, 107.82, 104.21, 102.76, 101.85, 88.60, 66.02, 65.66, 61.47, 55.53, 37.90, 32.95, 13.89. HRMS (TOF MS  $\text{ESI}^+$ ) calculated for  $\text{C}_{34}\text{H}_{39}\text{NO}_5\text{Si}$  [ $\text{M}+\text{Na}$ ] $^+$ : 592.2490, Found: 592.2494.

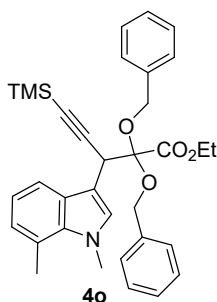

ethyl 2,2-bis(benzyloxy)-3-(1,7-dimethyl-1H-indol-3-yl)-5-(trimethylsilyl)pent-4-ynoate (**4o**). Yellow oil, 47.0 mg, 84% yield.  $^1\text{H}$  NMR (500 MHz,  $\text{CDCl}_3$ ):  $\delta$  0.12 (s, 9H), 1.04 (t,  $J = 7.1$  Hz, 3H), 2.67 (s, 3H), 3.91 (s, 3H), 3.86-3.93 (m, 1H), 3.97-4.02 (m, 1H), 4.66 (d,  $J = 12.0$  Hz, 1H), 4.77 (d,  $J = 12.0$  Hz, 1H), 4.81 (s, 1H), 4.86 (d,  $J = 12.1$  Hz, 1H), 5.01 (d,  $J = 12.1$  Hz, 1H), 6.81 (d,  $J = 7.0$  Hz, 1H), 6.86 (t,  $J = 7.5$  Hz, 1H), 6.96 (s, 1H), 7.19-7.24 (m, 3H), 7.27-7.31 (m, 5H), 7.38 (d,  $J = 7.3$  Hz, 2H), 7.55 (d,  $J = 7.8$  Hz, 1H);  $^{13}\text{C}$  NMR (125 MHz,  $\text{CDCl}_3$ ):  $\delta$  167.69, 138.20, 137.98, 135.30, 130.49, 128.42, 128.22, 128.15, 127.29, 127.28, 127.18, 127.07, 124.15, 120.94, 119.12, 118.08, 107.91, 104.49, 102.34, 88.40, 65.89, 65.56, 61.50, 37.27, 36.84, 19.72, 13.86. HRMS (TOF MS  $\text{ESI}^+$ ) calculated for  $\text{C}_{34}\text{H}_{39}\text{NO}_4\text{SiNa}$  [ $\text{M}+\text{Na}$ ] $^+$ : 576.2541, Found: 576.2549.

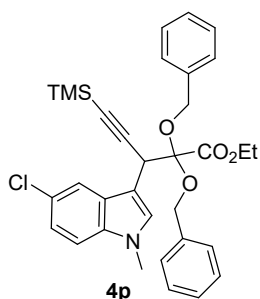

ethyl 2,2-bis(benzyloxy)-3-(5-chloro-1-methyl-1H-indol-3-yl)-5-(trimethylsilyl)pent-4-ynoate (**4p**). Yellow oil, 35.5 mg, 62% yield.  $^1\text{H}$  NMR (500 MHz,  $\text{CDCl}_3$ ):  $\delta$  0.22 (s, 9H), 1.16 (t,  $J = 7.1$  Hz, 3H), 3.69 (s, 3H), 3.97-4.10 (m, 2H), 4.74-4.86 (m, 4H), 5.02 (d,  $J = 11.8$  Hz, 1H), 7.08 (s, 1H), 7.13-7.17 (m, 2H), 7.27-7.32 (m, 2H), 7.34-7.38 (m, 6H), 7.45 (d,  $J = 7.4$  Hz, 2H), 7.85 (d,  $J = 1.6$  Hz, 1H);  $^{13}\text{C}$  NMR (125 MHz,  $\text{CDCl}_3$ ):  $\delta$  167.43, 137.86, 137.85, 135.16, 130.24, 128.29, 128.24, 127.43, 127.38, 127.33, 127.18, 124.92, 121.76, 119.93, 110.13, 107.99, 103.68, 102.58, 89.07, 66.03, 65.59, 61.58, 37.63, 32.98, 13.87, 0.13. HRMS (TOF MS  $\text{ESI}^+$ ) calculated for  $\text{C}_{33}\text{H}_{36}\text{ClNO}_4\text{SiNa}$  [ $\text{M}+\text{Na}$ ] $^+$ : 596.1995, Found: 596.1991.

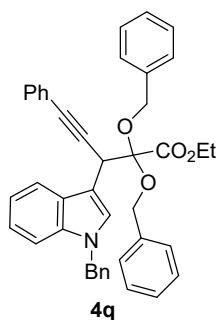

ethyl 3-(1-benzyl-1H-indol-3-yl)-2,2-bis(benzyloxy)-5-phenylpent-4-ynoate (**4q**). Yellow oil, 50.1 mg, 81% yield.  $^1\text{H}$  NMR (500 MHz,  $\text{CDCl}_3$ ):  $\delta$  1.0 (t,  $J = 7.1$  Hz, 3H), 3.88-4.02 (m, 2H), 4.77 (d,  $J = 11.8$  Hz, 1H), 4.84 (d,  $J = 11.9$  Hz, 1H), 4.89 (d,  $J = 11.7$  Hz, 1H), 5.07 (d,  $J = 10.9$  Hz, 2H), 5.28 (s, 2H), 7.06-7.11 (m, 3H), 7.16 (t,  $J = 7.6$  Hz, 1H), 7.24-7.25 (m, 2H), 7.26-7.30 (m, 11H), 7.32-7.35 (m, 3H), 7.42-7.44 (m, 4H), 7.91 (d,  $J = 8.0$  Hz, 1H);  $^{13}\text{C}$  NMR (125 MHz,  $\text{CDCl}_3$ ):  $\delta$  167.70, 137.92, 137.90, 137.45, 136.33, 131.57, 128.68, 128.38, 128.25, 128.19, 128.15, 127.83, 127.70, 127.51, 127.46, 127.40, 127.37, 127.34, 126.74, 123.70, 121.74, 120.47, 119.29, 109.56, 109.43, 102.93, 87.78, 84.12, 66.17, 65.59, 61.51, 50.03, 37.41, 13.80. HRMS (TOF MS  $\text{ESI}^+$ ) calculated for  $\text{C}_{42}\text{H}_{37}\text{NO}_4\text{Na}$  [ $\text{M}+\text{Na}$ ] $^+$ : 642.2615, Found: 642.2610.

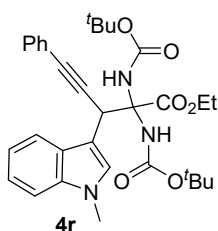

ethyl 2,2-bis((tert-butoxycarbonyl)amino)-3-(1-methyl-1H-indol-3-yl)-5-phenylpent-4-ynoate (**4r**). Yellow solid, m.p. = 68-70  $^\circ\text{C}$ , 39.3 mg, 70% yield.  $^1\text{H}$  NMR (500 MHz,  $\text{CDCl}_3$ ):  $\delta$  1.26 (t,  $J = 7.0$  Hz, 3H), 1.40 (s, 9H), 1.44 (s, 9H), 3.77 (s, 3H), 4.23 (q,  $J = 7.1$  Hz, 2H), 5.35 (s, 1H), 6.22 (s, 2H), 7.04 (s, 1H), 7.10 (t,  $J = 7.3$  Hz, 1H), 7.21 (t,  $J = 7.6$  Hz, 1H), 7.28-7.31 (m, 4H), 7.45-7.47 (m, 2H), 7.81 (d,  $J = 7.4$  Hz, 1H);  $^{13}\text{C}$  NMR (125 MHz,  $\text{CDCl}_3$ ):  $\delta$  168.63, 154.07, 153.80, 136.83, 131.69, 128.91, 128.19, 128.04, 127.44, 123.31, 121.76, 119.60, 119.45, 109.45, 107.99, 86.72, 84.12, 80.16, 79.82, 72.84, 62.55, 36.62, 32.93, 28.17, 13.97. HRMS (TOF MS  $\text{ESI}^+$ ) calculated for  $\text{C}_{32}\text{H}_{39}\text{N}_3\text{O}_6\text{Na}$  [ $\text{M}+\text{Na}$ ] $^+$ : 584.2731, Found: 584.2725.

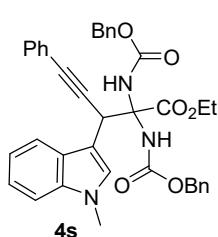

ethyl 2,2-bis(((benzyloxy)carbonyl)amino)-3-(1-methyl-1H-indol-3-yl)-5-phenylpent-4-ynoate (**4s**). Yellow solid, m.p. = 76-78  $^\circ\text{C}$ , 45.3 mg, 72% yield.  $^1\text{H}$  NMR (500 MHz,  $\text{CDCl}_3$ ):  $\delta$  1.18 (t,  $J = 7.1$  Hz, 3H), 3.69 (s, 3H), 4.18 (brs, 2H), 4.98 (d,  $J = 11.1$  Hz, 1H), 5.14-5.15 (m, 3H), 5.46 (s, 1H), 6.45 (s, 1H), 6.59 (s, 1H), 6.92 (s, 1H), 7.04 (t,  $J = 7.1$  Hz, 1H), 7.20 (t,  $J = 7.5$  Hz, 1H), 7.26-7.30 (m, 3H), 7.31-7.36 (m, 11H), 7.43-7.45 (m, 2H), 7.75 (d,  $J = 7.1$  Hz, 1H);  $^{13}\text{C}$  NMR (125 MHz,  $\text{CDCl}_3$ ):  $\delta$  167.81, 154.51, 154.25, 136.78, 136.19, 131.66, 129.00, 128.44, 128.41, 128.25, 128.20, 128.16, 128.11, 128.03, 127.91, 127.23, 123.01, 121.84, 119.58, 119.23, 109.53, 107.40, 86.18, 84.50, 73.07, 66.78, 66.64, 62.85, 36.39, 32.86, 13.80. HRMS (TOF MS  $\text{ESI}^+$ ) calculated for  $\text{C}_{38}\text{H}_{35}\text{N}_3\text{O}_6\text{Na}$  [ $\text{M}+\text{Na}$ ] $^+$ : 652.2418, Found: 652.2419.

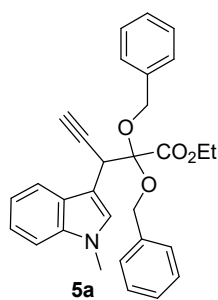

ethyl 2,2-bis(benzyloxy)-3-(1-methyl-1H-indol-3-yl)pent-4-ynoate (**5a**). Yellow oil, 85.0 mg, 91% yield.  $^1\text{H}$  NMR (400 MHz,  $\text{CDCl}_3$ ):  $\delta$  1.00 (t,  $J = 7.1$  Hz, 3H), 2.36 (d,  $J = 2.7$  Hz, 1H), 3.69 (s, 3H), 3.89-4.03 (m, 2H), 4.66 (d,  $J = 12.0$  Hz, 1H), 4.72 (d,  $J = 12.0$  Hz, 1H), 4.84 (d,  $J = 2.6$  Hz, 1H), 4.88 (d,  $J = 12.0$  Hz, 1H), 4.99 (d,  $J = 11.9$  Hz, 1H), 7.03 (t,  $J = 7.5$  Hz, 1H), 7.14 (s, 1H), 7.17 (t,  $J = 7.3$  Hz, 1H), 7.21-7.25 (m, 4H), 7.27-7.33 (m, 5H), 7.39 (d,  $J = 7.4$  Hz, 2H), 7.73 (d,  $J = 8.0$  Hz, 1H);  $^{13}\text{C}$  NMR (100 MHz,  $\text{CDCl}_3$ ):  $\delta$  167.58, 137.86, 137.74, 136.69, 128.90, 128.27, 128.16, 127.41, 127.39, 127.33, 127.30, 127.25, 121.59, 120.08, 119.03, 109.07, 108.25, 102.56, 82.04, 72.28, 66.23, 65.43, 61.57, 36.45, 32.81, 13.77. HRMS (TOF MS  $\text{ESI}^+$ ) calculated for  $\text{C}_{30}\text{H}_{29}\text{NO}_4\text{Na}$  [ $\text{M}+\text{Na}$ ] $^+$ : 490.1989, Found: 490.1981.

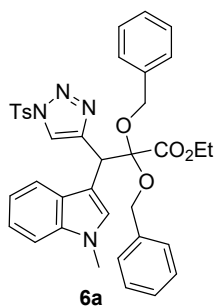

ethyl 2,2-bis(benzyloxy)-3-(1-methyl-1H-indol-3-yl)-3-(1-tosyl-1H-1,2,3-triazol-4-yl)propanoate (**6a**). Yellow oil, m.p. = 45-47 °C, 61.8 mg, 93% yield.  $^1\text{H}$  NMR (500 MHz,  $\text{CDCl}_3$ ):  $\delta$  0.80 (t,  $J = 7.1$  Hz, 3H), 2.31 (s, 3H), 3.62 (s, 3H), 3.78-3.88 (m, 2H), 4.57-4.67 (m, 4H), 5.38 (s, 1H), 6.89-6.92 (m, 1H), 7.06-7.09 (m, 1H), 7.12 (s, 1H), 7.14-7.17 (m, 6H), 7.19-7.27 (m, 7H), 7.39 (d,  $J = 8.0$  Hz, 1H), 7.75-7.77 (m, 2H), 8.05 (s, 1H);  $^{13}\text{C}$  NMR (125 MHz,  $\text{CDCl}_3$ ):  $\delta$  168.21, 146.81, 146.68, 137.81, 137.53, 136.32, 133.30, 130.22, 129.09, 128.41, 128.31, 128.23, 127.53, 127.50, 127.48, 127.44, 127.31, 123.52, 121.50, 119.10, 119.02, 109.13, 109.06, 102.72, 66.40, 66.17, 61.44, 40.82, 32.83, 21.72, 13.52. HRMS (TOF MS  $\text{ESI}^+$ ) calculated for  $\text{C}_{37}\text{H}_{36}\text{N}_4\text{O}_6\text{SNa}$  [ $\text{M}+\text{Na}$ ] $^+$ : 687.2248, Found: 687.2244.

## 6. Four-component Trifunctionalization Reaction Using Different Nucleophiles

The reaction was conducted on a 0.1 mmol scale: to a solution of  $\text{Rh}_2(\text{OAc})_4$  (0.9 mg, 2.0 mol %), phosphoric acid (3.5 mg, 10 mol %), benzyl alcohol **2a** (0.2 mmol),  $\text{CbzNH}_2$  **2a'** (0.2 mmol) and 4 Å MS (150 mg) in DCM (1.0 mL) was added a solution of diazo compound **1a** (0.15 mmol) and  $\alpha$ -propargylic-3-indolymethanol **3a** (0.1 mmol), in DCM (3.0 mL) via a syringe pump in 1 h under an argon atmosphere at  $-20\text{ }^\circ\text{C}$ . After diazo compound **1a** were completely consumed (monitored by TLC analysis), and then LCMS analysis was performed for reaction mixture. The molecular weight of the products **4a**, **4s**, **4t** were found on LCMS, however, almost only product **4a** was observed by TLC. The reaction mixture was concentrated in vacuum, the residue was purified by column chromatography on silica gel (eluent: EtOAc/light petroleum ether = 1/10) to obtain the product **4a** as main product. *This result likely due to the nucleophilic attack of benzyl alcohol prior to the nucleophilic attack of  $\text{CbzNH}_2$ , which resulted in the di-oxonium ylide interception by  $\alpha$ -propargylic-3-indolymethanol under the catalysis of phosphoric acid.*

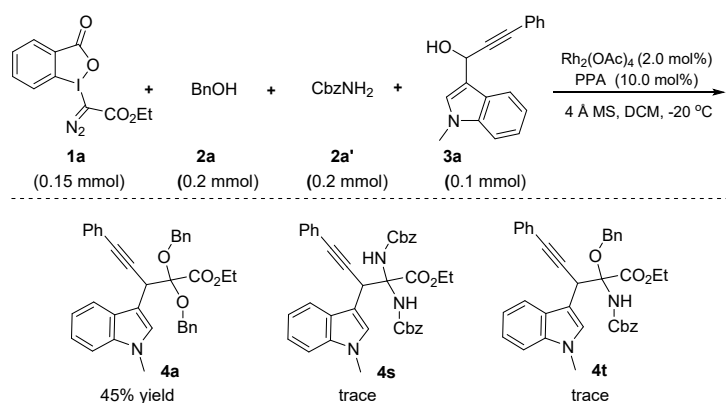

## 7. Procedures for Scale up and Derivations

### A: Procedure for the scale-up synthesis of product 4I

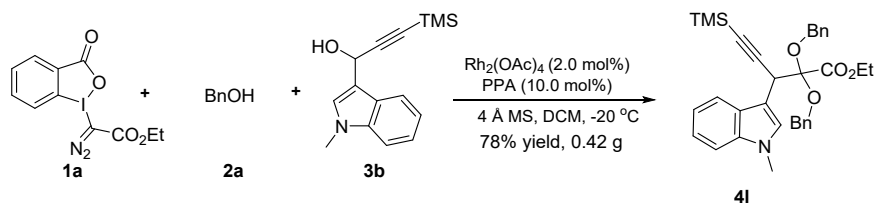

The reactions were conducted on a 1.0 mmol scale: to a solution of  $\text{Rh}_2(\text{OAc})_4$  (9 mg, 2.0 mol %), phosphoric acid (35 mg, 10.0 mol %), alcohol **2a** (4 mmol), and 4 Å MS (1500 mg) in DCM (10.0 mL) was added a solution of diazo compound **1a** (1.5 mmol) and  $\alpha$ -propargylic-3-indolymethanol **3b** (1.0 mmol), in DCM (30.0 mL) via a syringe pump in 1 h under an argon atmosphere at indicate temperature. After completion of the addition, stirring was continued at indicate temperature for 0.5 h. The solution was concentrated in vacuum. And then the residue was purified by column chromatography on silica gel (eluent: EtOAc/light petroleum ether = 1/10) to give the product **4I** in 78% yield.

### B: General Procedure for the Synthesis of 5a

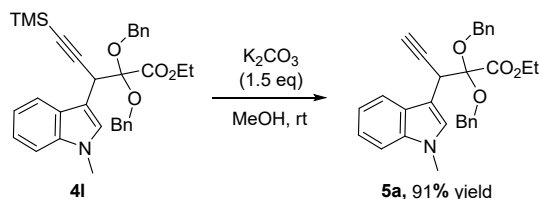

To a 10-mL oven-dried vial containing a magnetic stirring bar, propargylic indole derivative **4I** (107.8 mg, 0.2 mmol) in 5 mL of MeOH, was added  $\text{K}_2\text{CO}_3$  (41.4 mg, 1.5 eq). the reaction mixture was stirred overnight at room temperature. After the propargylic indole derivative **4I** was completely consumed ( indicated by TLC analysis), the crude reaction mixture concentrated in vacuo and the product was purified by column chromatography on silica gel without any additional treatment (Hexanes : EtOAc = 10:1) to give the pure products **5a** in 91% yield.

### C: General Procedure for the Synthesis of 6a

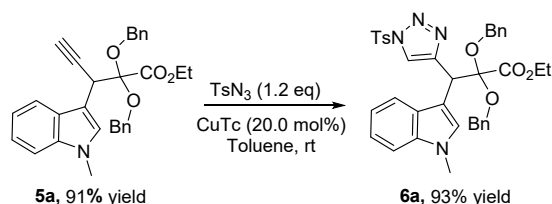

To a 10-mL oven-dried vial containing a magnetic stirring bar and  $\text{CuTc}$  (3.8 mg, 20.0 mol %) in 1.0 mL of toluene, was added propargylic indole derivative **5a** (47.0 mg, 0.1 mmol) and  $\text{TsN}_3$  (23.6 mg, 0.12mmol) in 1.0 mL of toluene under argon atmosphere. The mixture was

stirred 5h at room temperature. After propargylic indole derivative **5a** was completely consumed (monitored by TLC analysis), the crude reaction mixture concentrated in vacuo and the product was purified by column chromatography on silica gel without any additional treatment (Hexanes : EtOAc = 6:1) to give the pure products **6a** in 93% yield.



## 8. X-Ray crystallographic data for compounds 4s.

Single-crystal X-Ray diffraction analysis of **4s**: The crystal of **4s** used for the single-crystal X-ray diffraction experiment was grown by slow evaporation of a solution of **4s** in dichloromethane and hexane at 25 °C . An ORTEP diagram of the crystal structure of **4s** is shown below (CCDC No: 2307507)

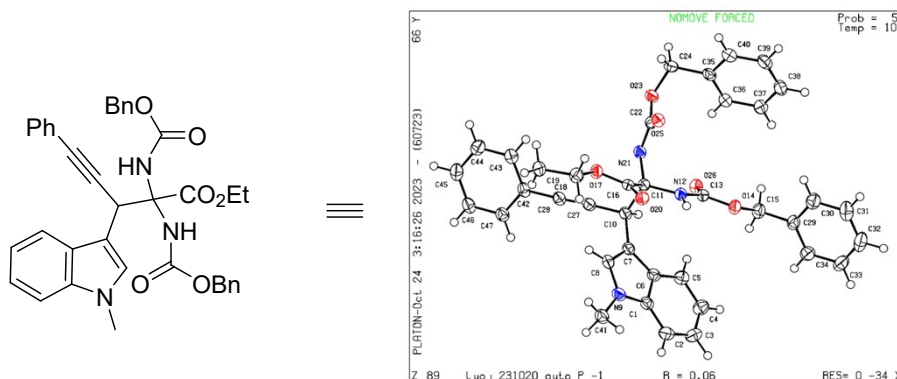

### Datablock: luoj\_231020\_auto

Bond precision: C-C = 0.0034 Å

Wavelength=1.54184

Cell: a=11.0033 (5)

b=12.5268 (5)

c=12.5483 (5)

alpha=106.431 (4)

beta=91.810 (4)

gamma=103.462 (4)

Temperature: 100 K

|                        | Calculated    | Reported      |
|------------------------|---------------|---------------|
| Volume                 | 1604.57 (13)  | 1604.57 (12)  |
| Space group            | P -1          | P -1          |
| Hall group             | -P 1          | -P 1          |
| Moiety formula         | C38 H35 N3 O6 | C38 H35 N3 O6 |
| Sum formula            | C38 H35 N3 O6 | C38 H35 N3 O6 |
| Mr                     | 629.69        | 629.69        |
| Dx, g cm <sup>-3</sup> | 1.303         | 1.303         |
| Z                      | 2             | 2             |
| Mu (mm <sup>-1</sup> ) | 0.721         | 0.721         |
| F000                   | 664.0         | 664.0         |
| F000'                  | 666.05        |               |
| h, k, lmax             | 13, 15, 15    | 13, 15, 15    |
| Nref                   | 6627          | 6200          |
| Tmin, Tmax             | 0.841, 0.930  | 0.862, 1.000  |
| Tmin'                  | 0.805         |               |

Correction method= # Reported T Limits: Tmin=0.862 Tmax=1.000

AbsCorr = MULTI-SCAN

Data completeness= 0.936

Theta(max)= 75.230

R(reflections)= 0.0636 ( 4849)

wR2(reflections)=  
0.1885 ( 6200)

S = 1.038

Npar= 434

## 9. Copies of $^1\text{H}$ NMR and $^{13}\text{C}$ NMR Spectra of Products 4, 5a, 6a

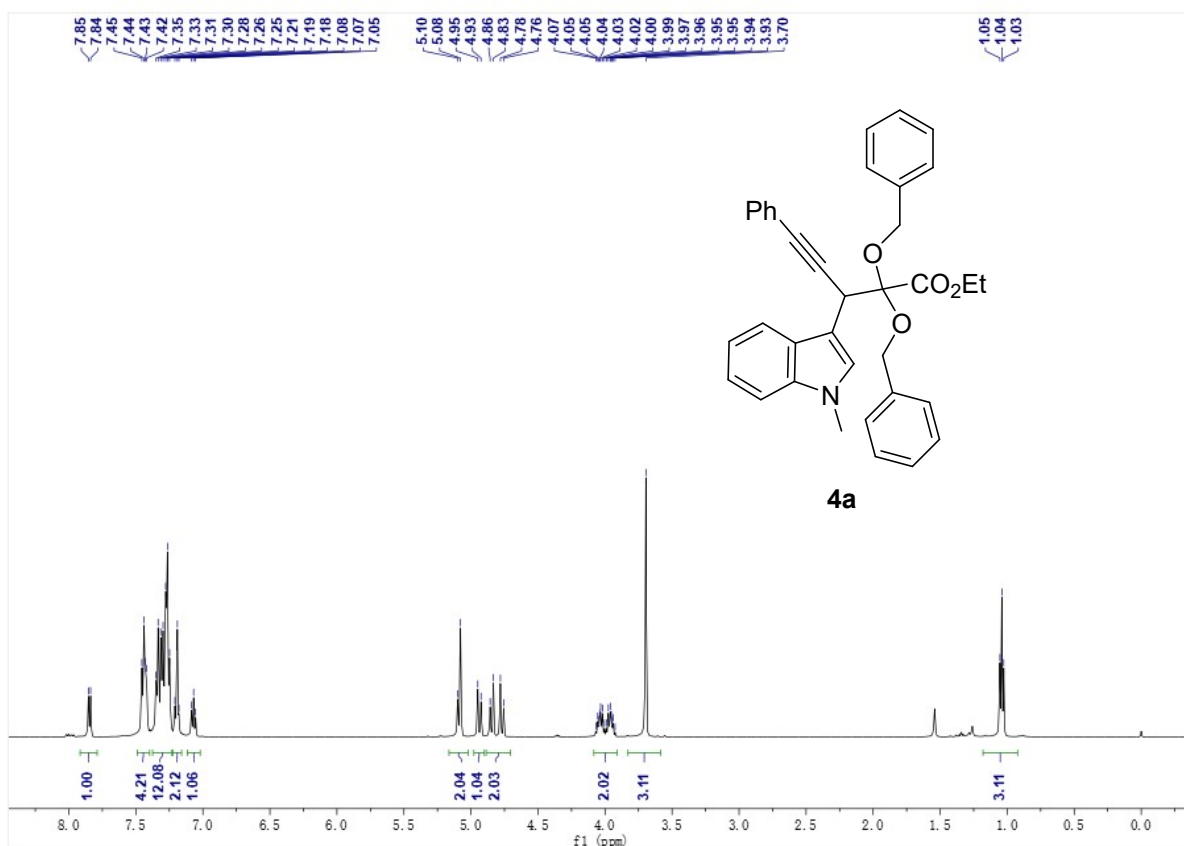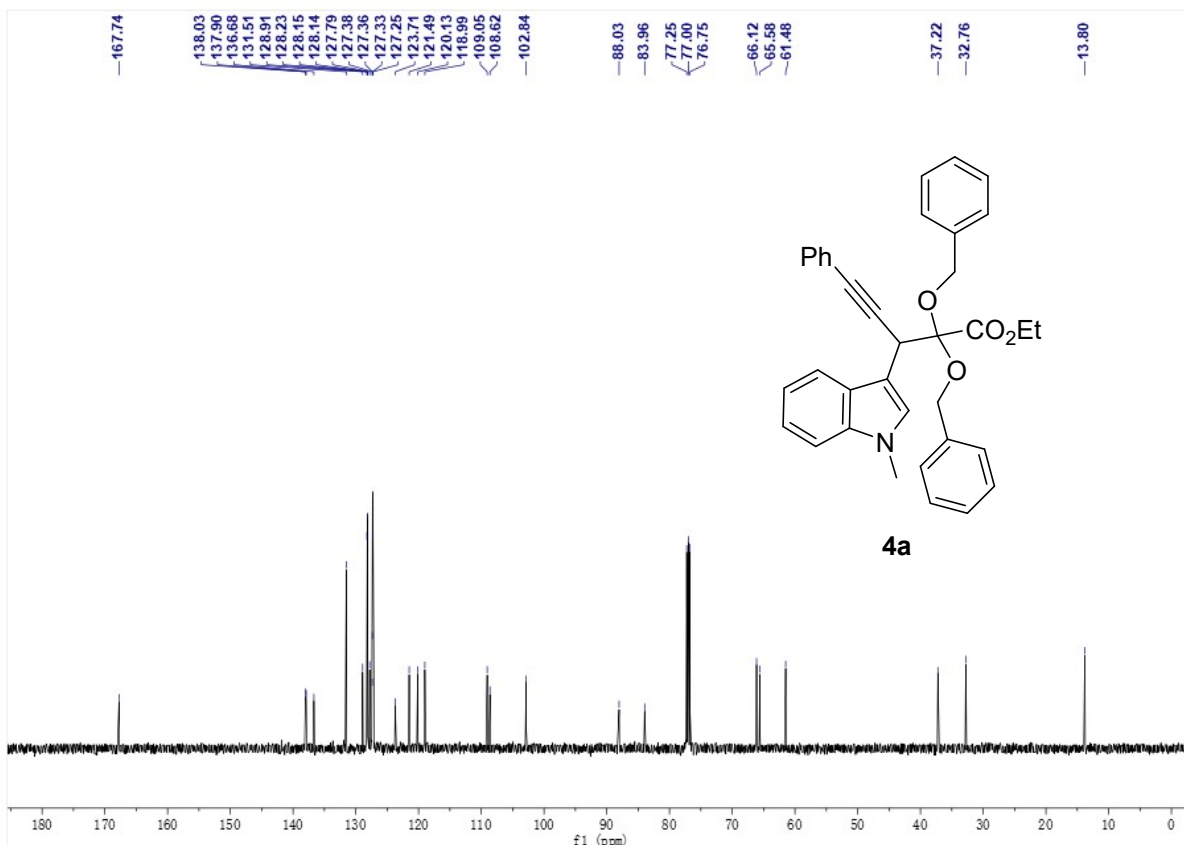

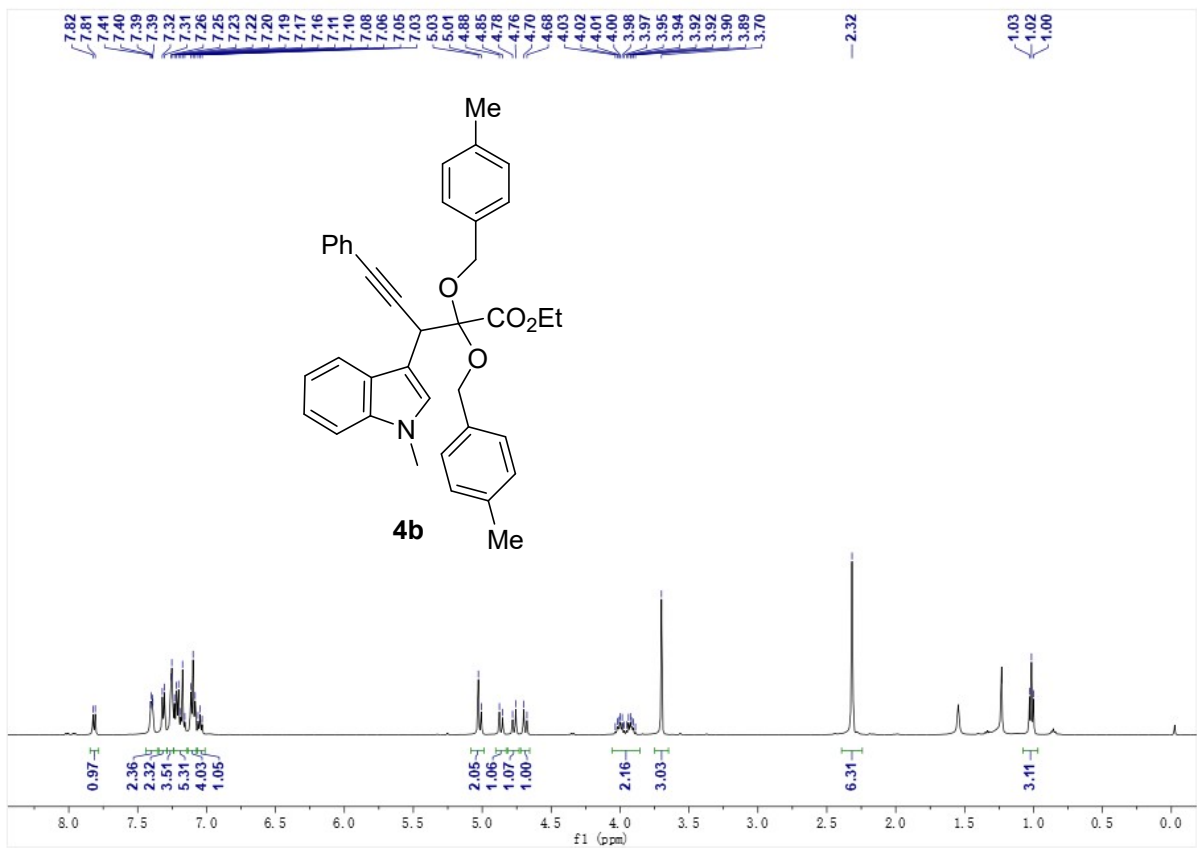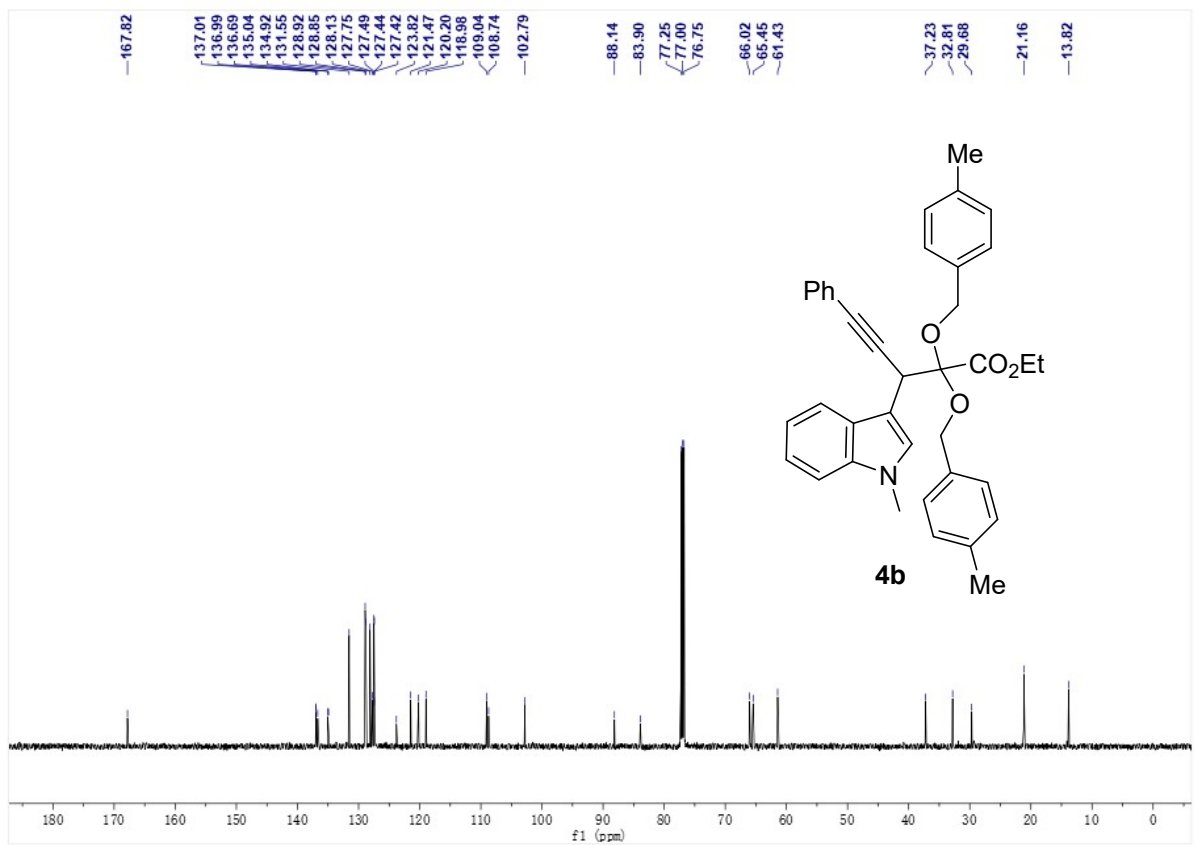

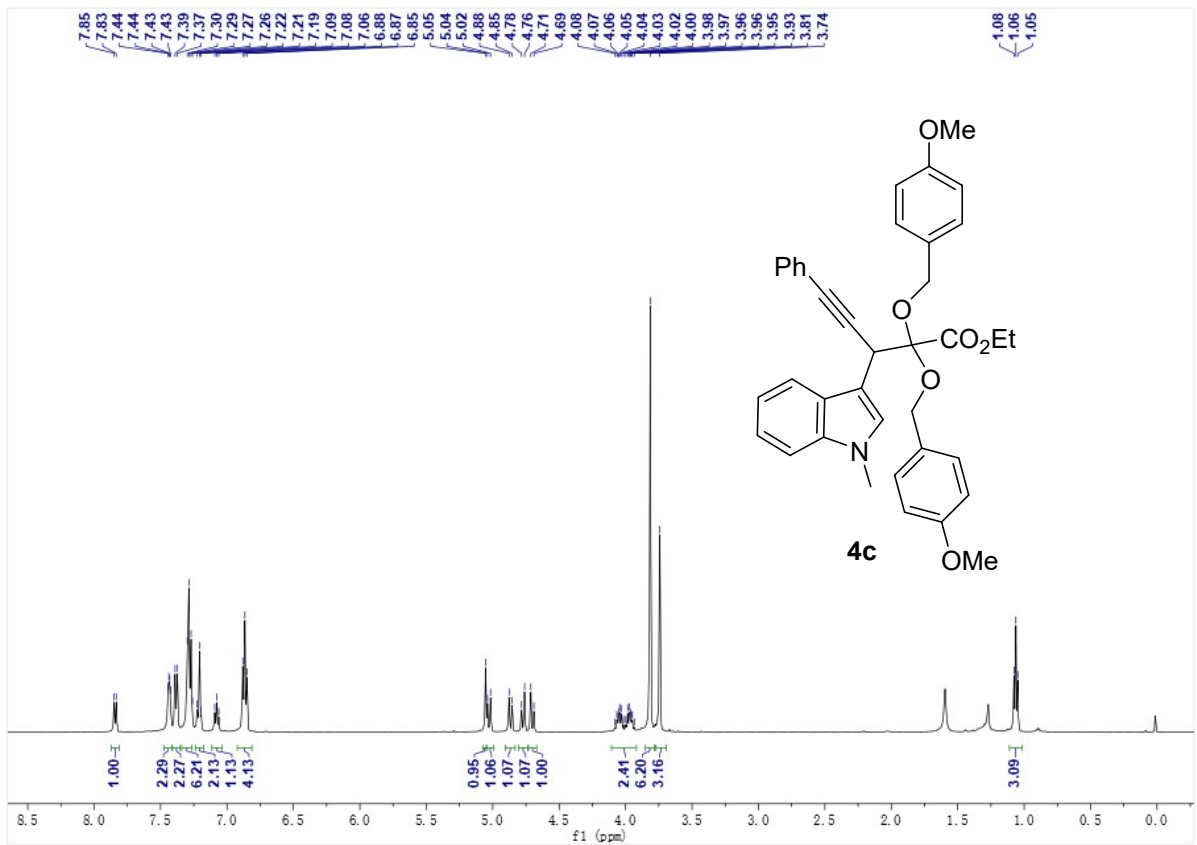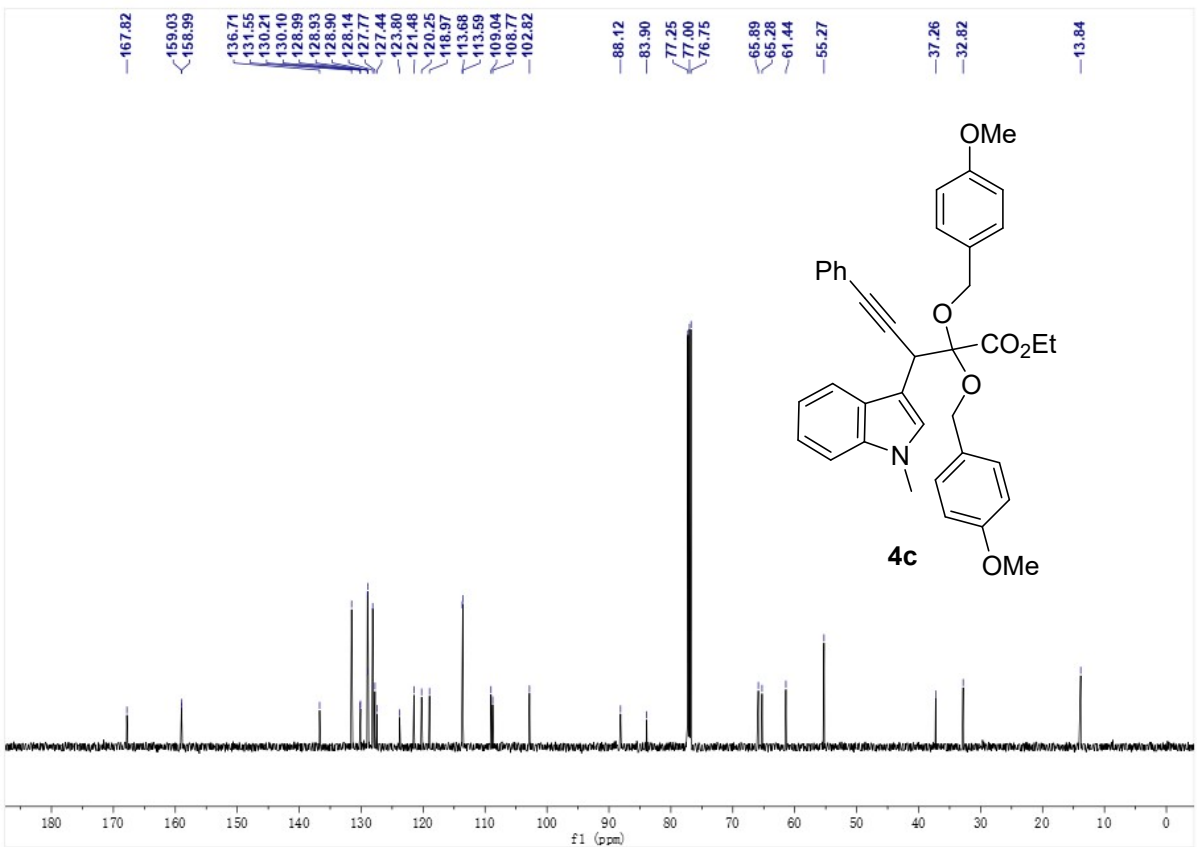

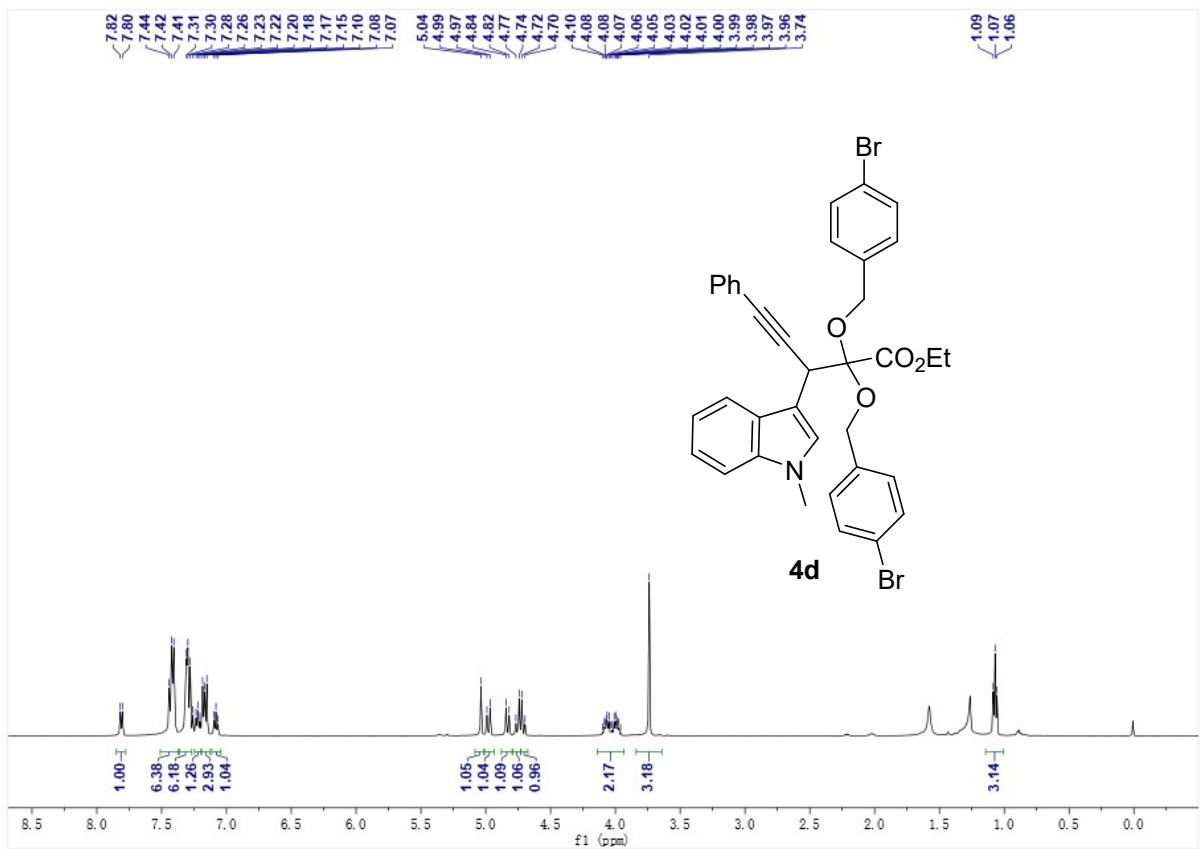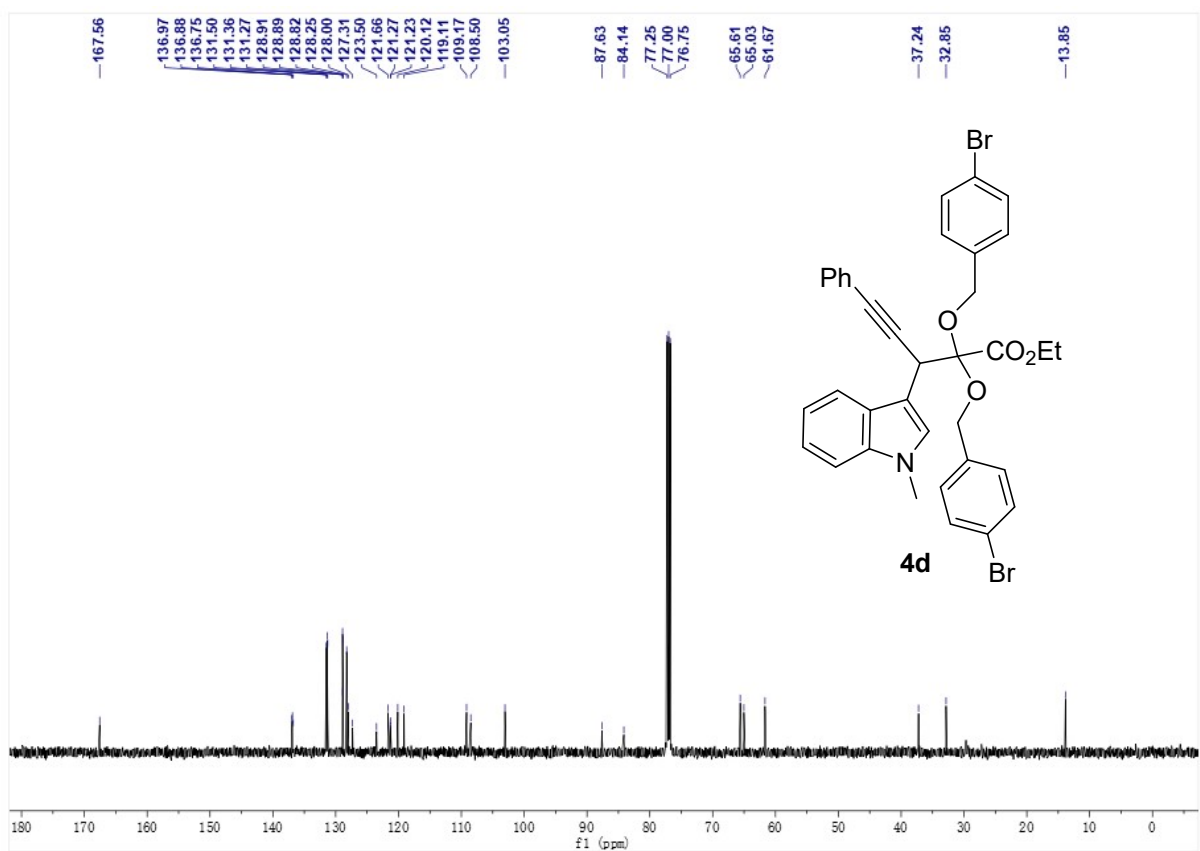

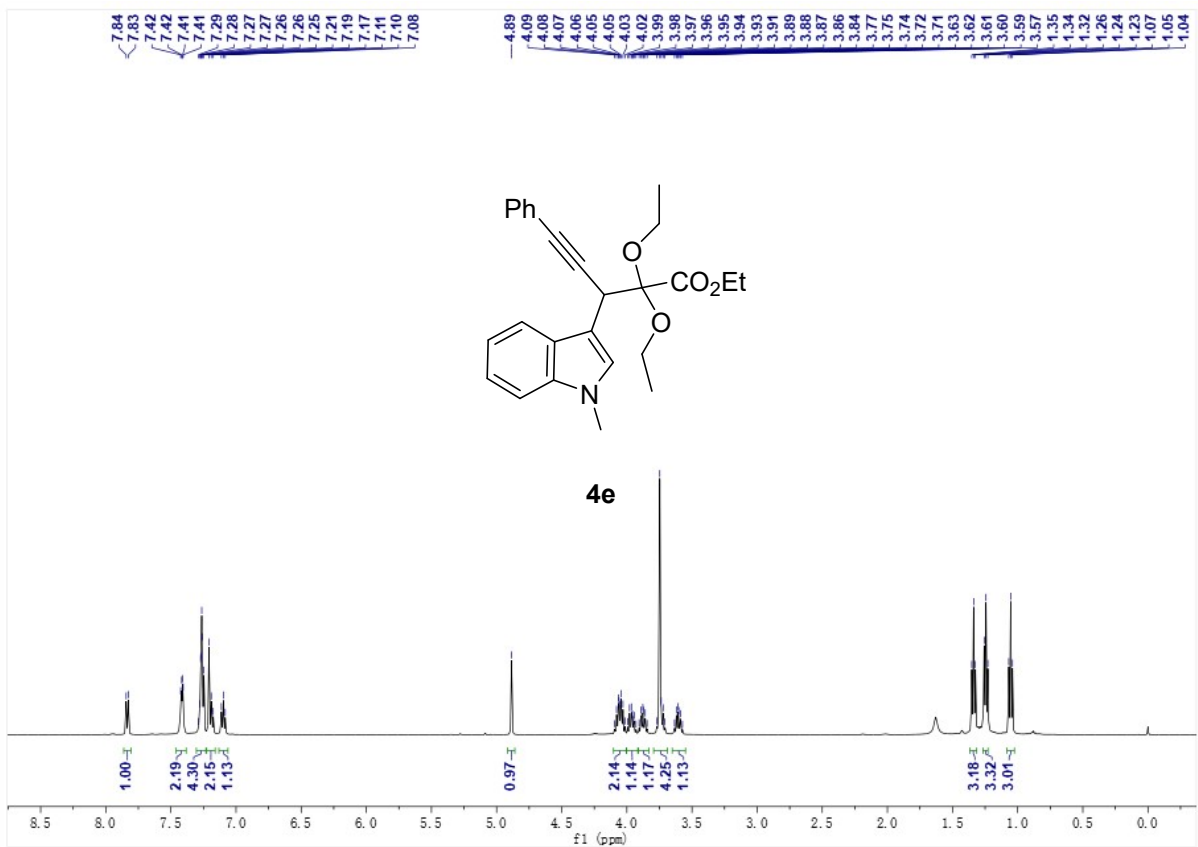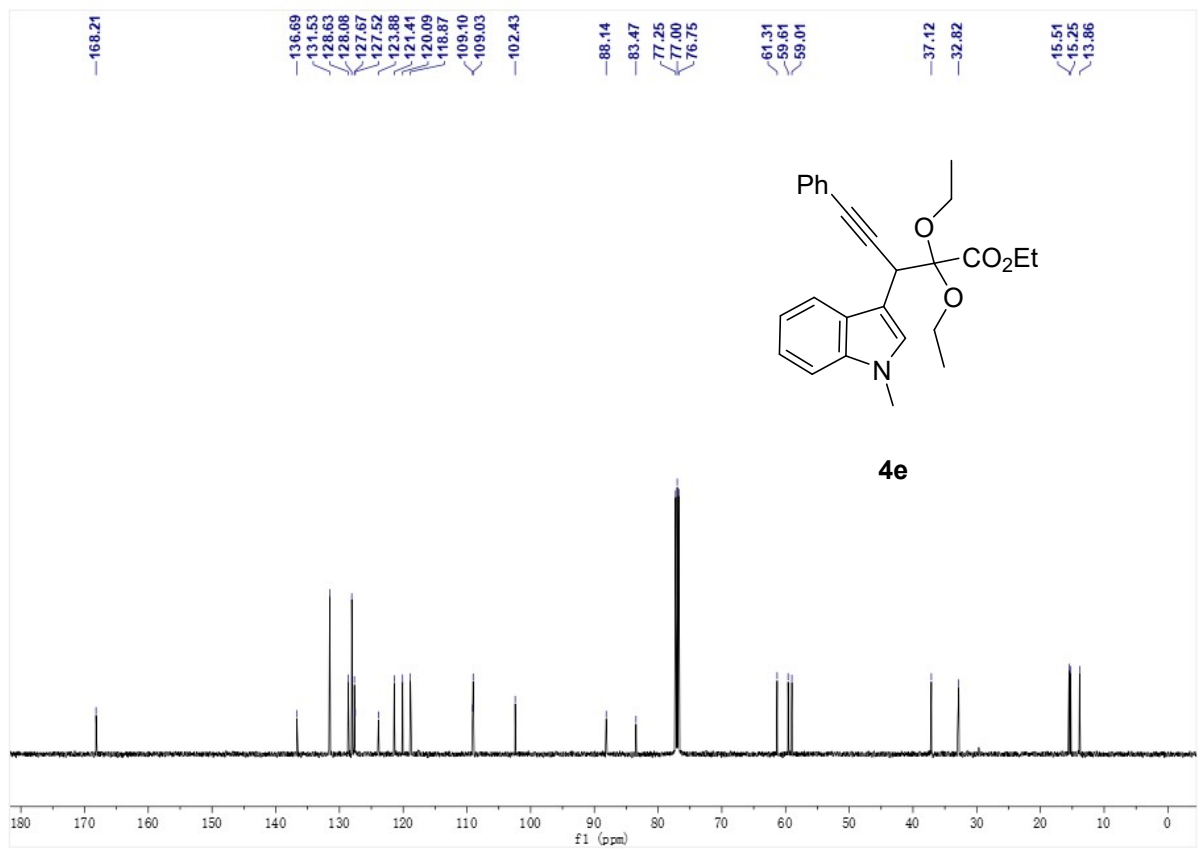

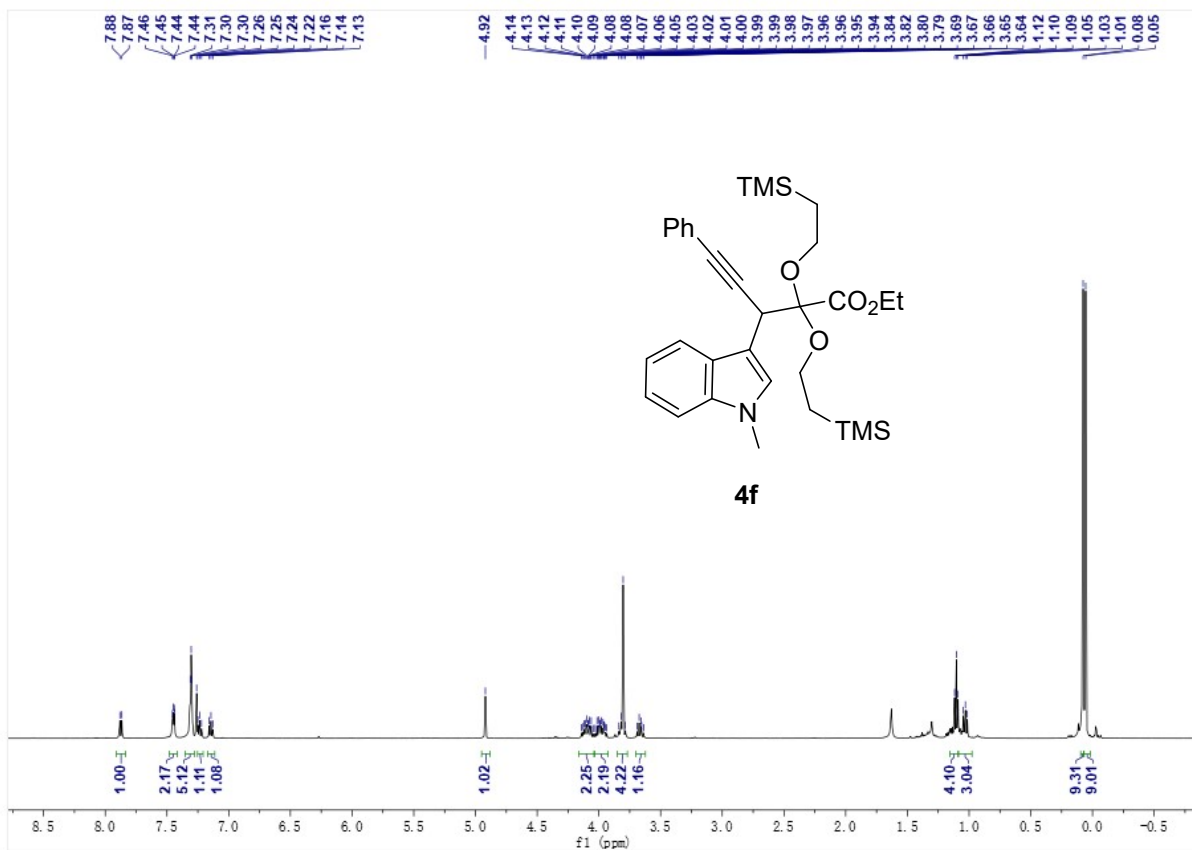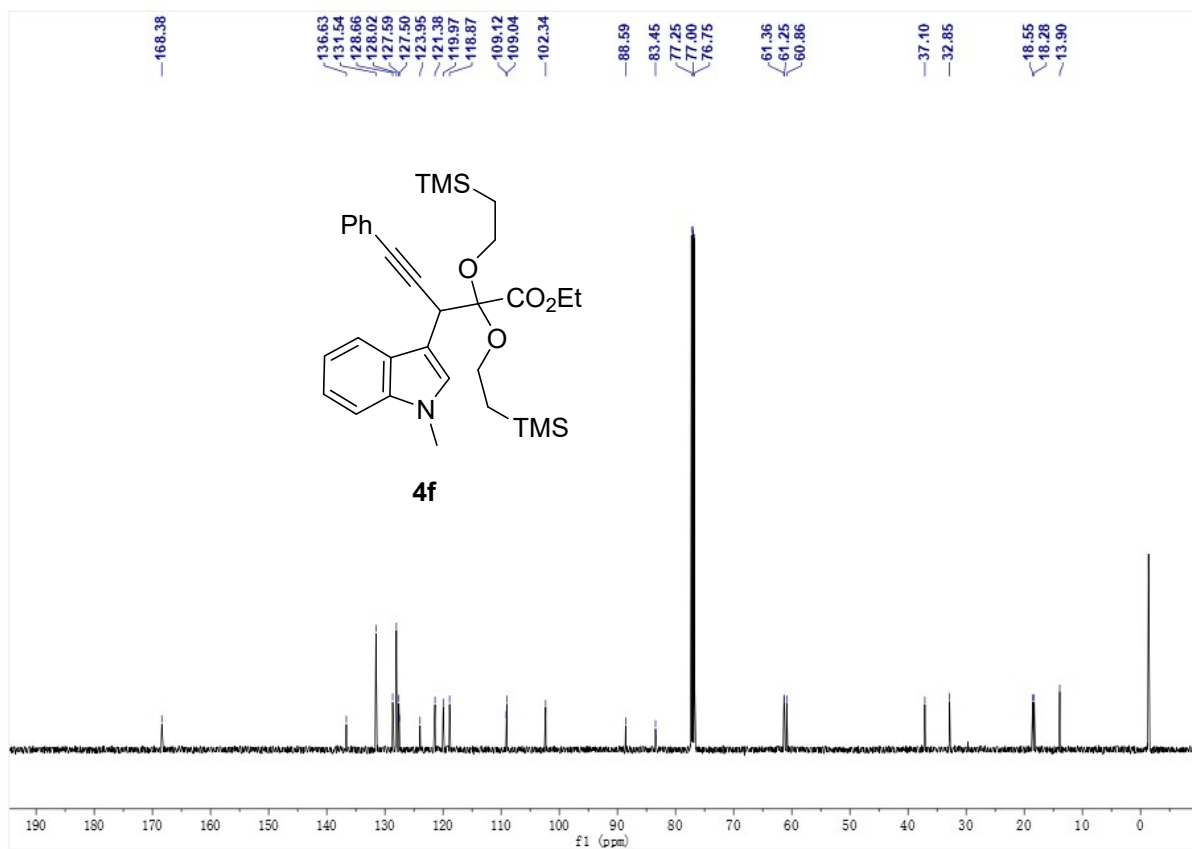

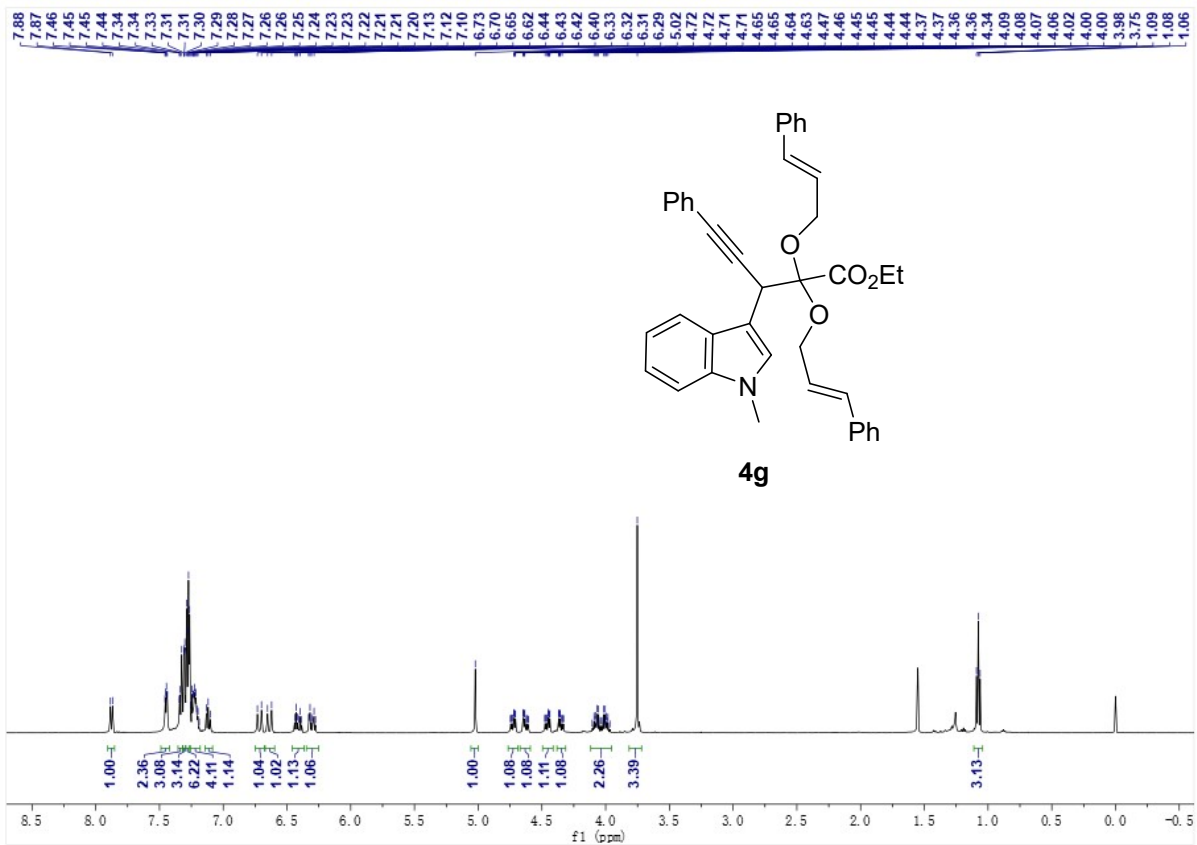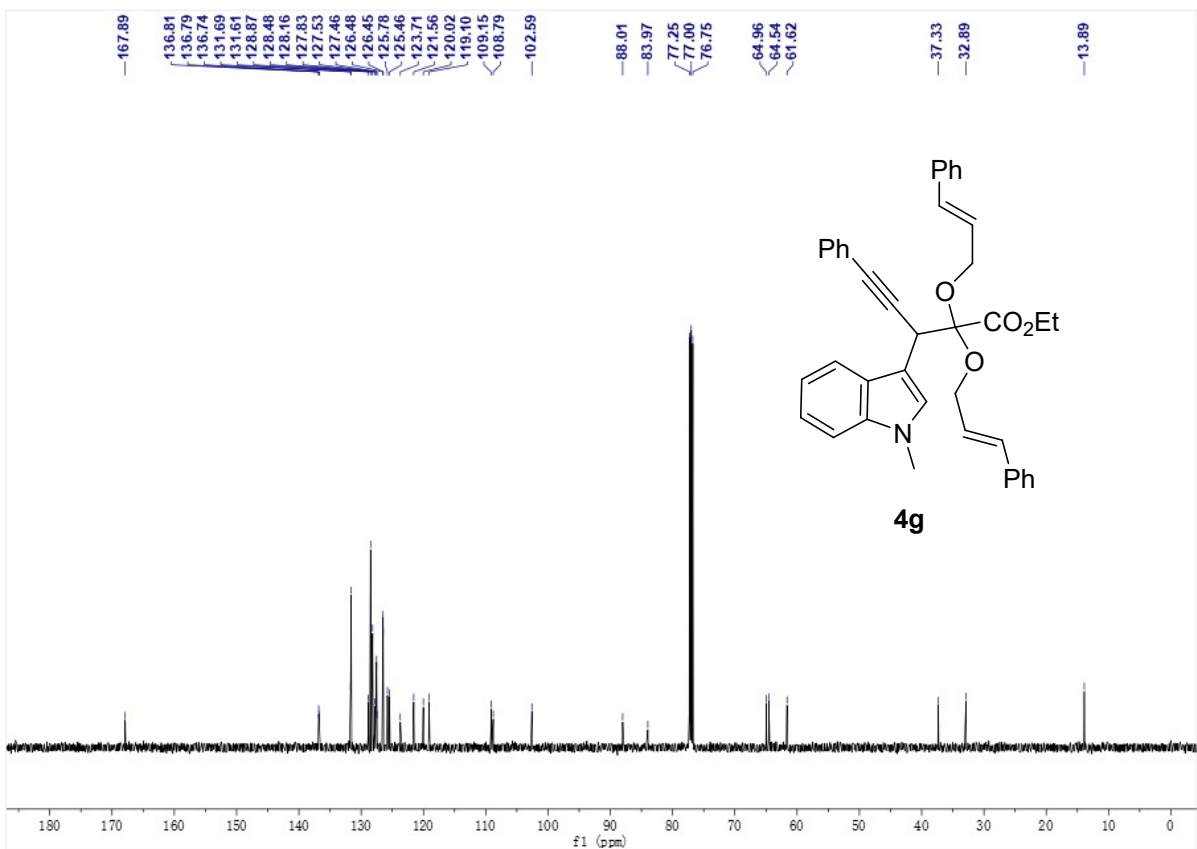



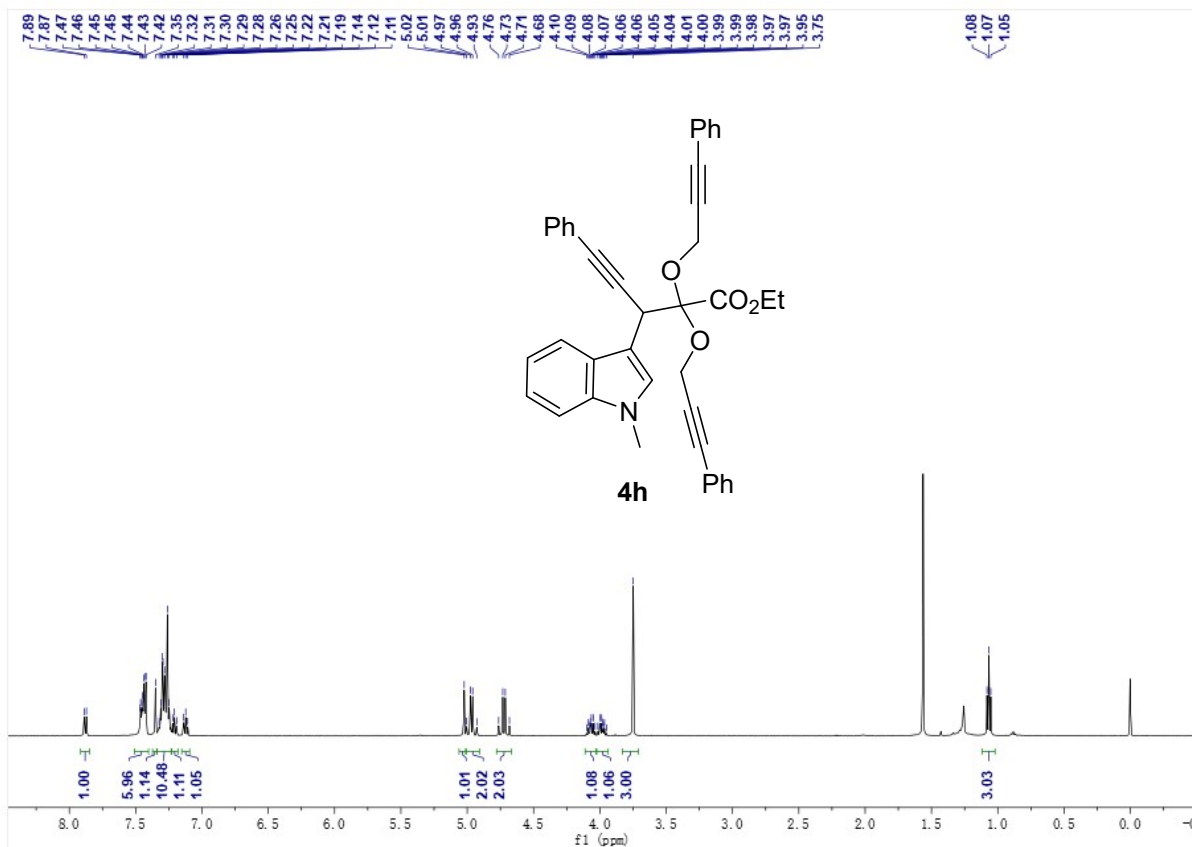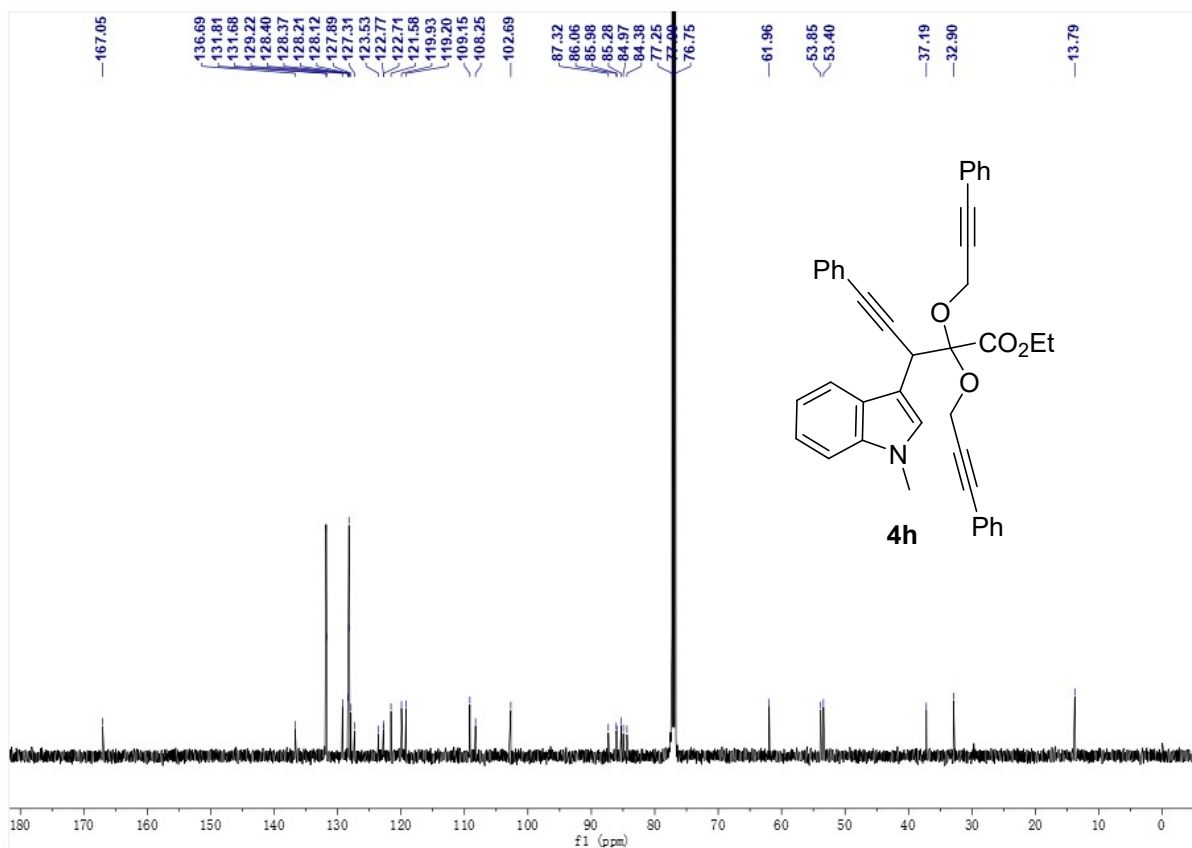

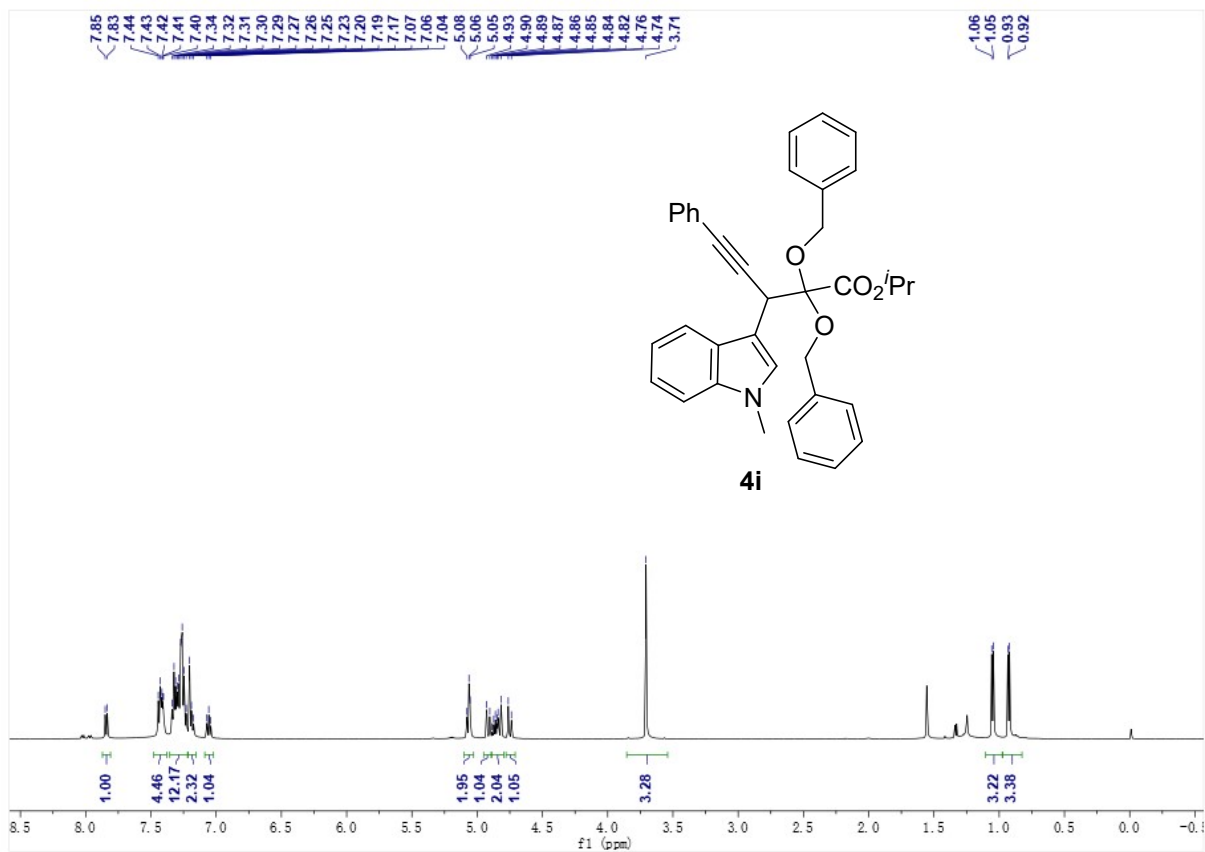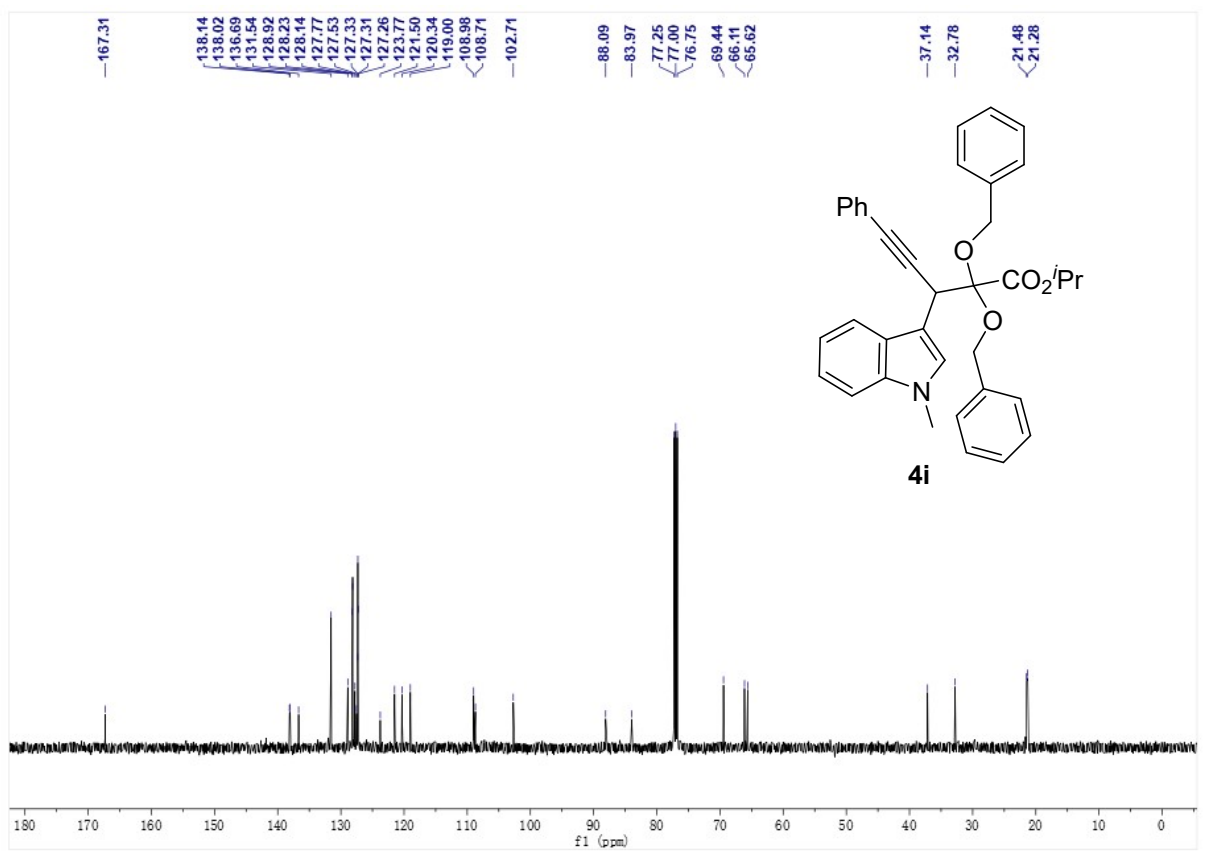

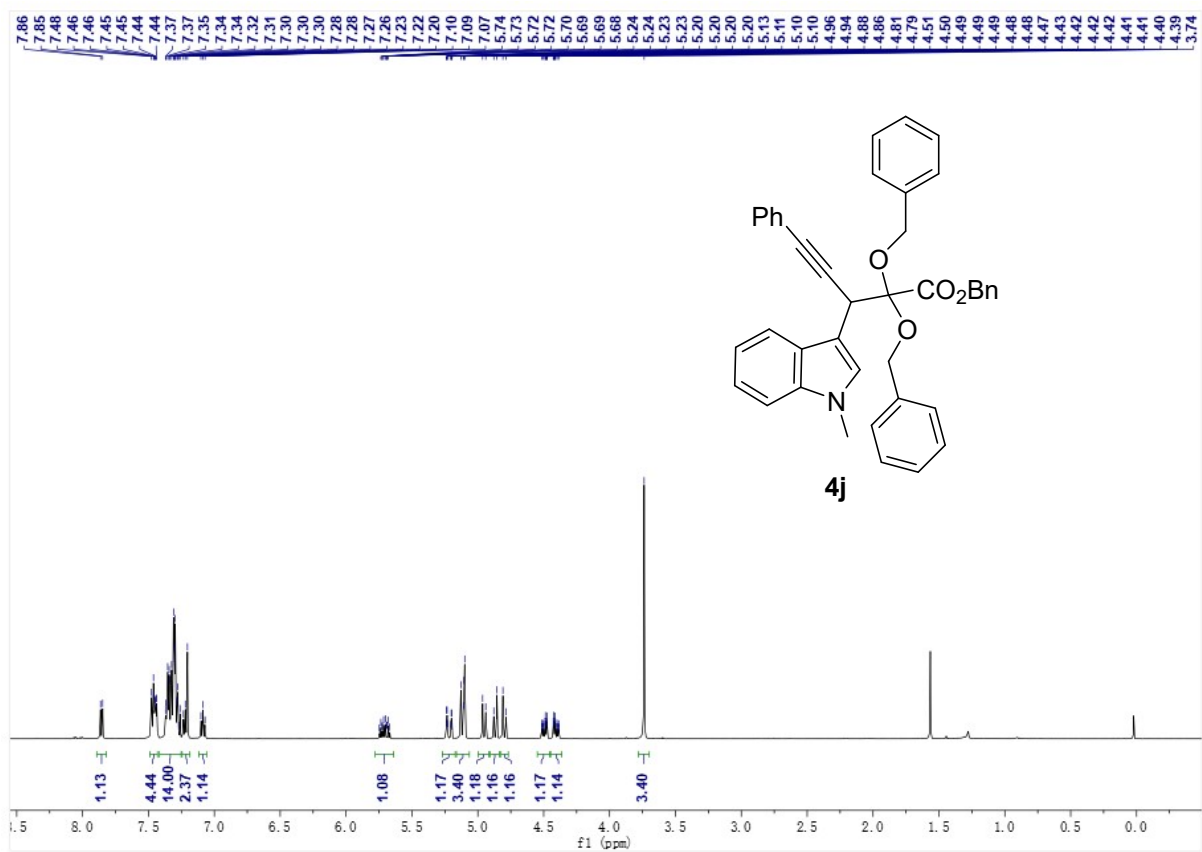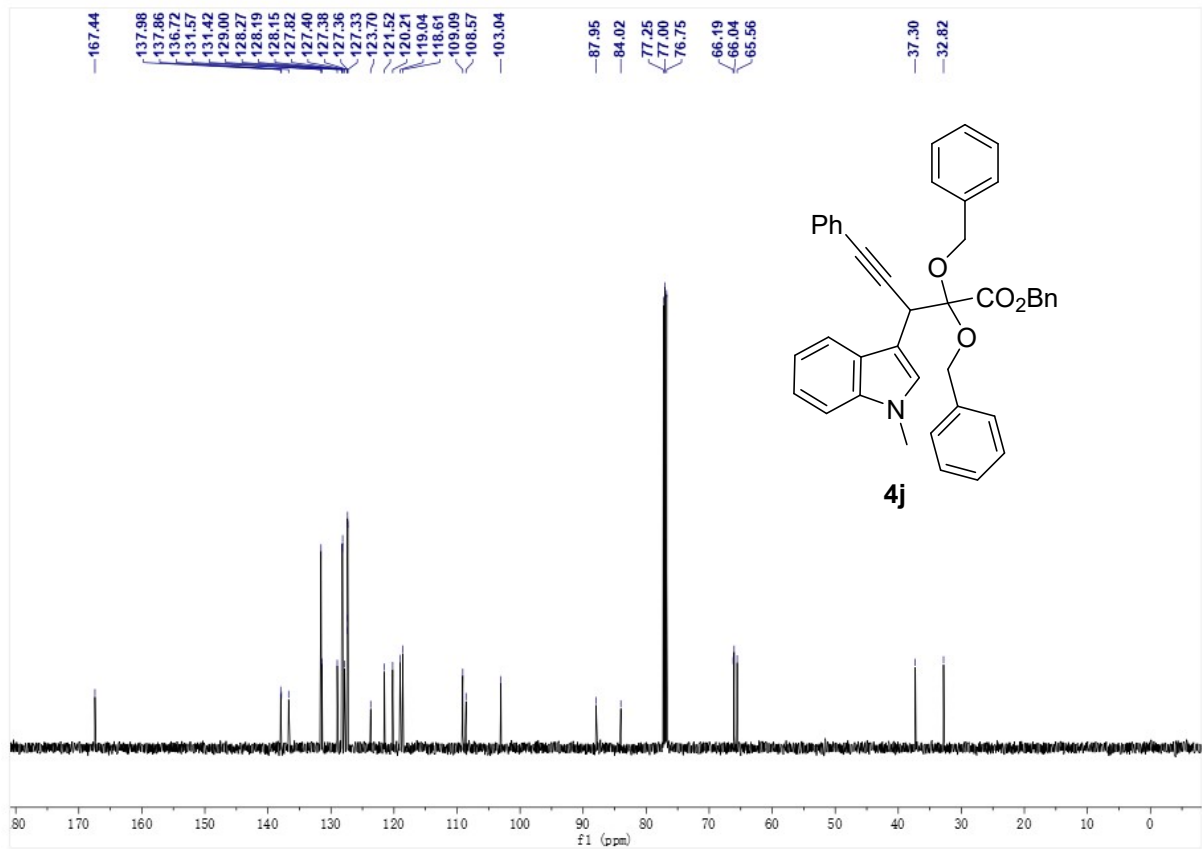

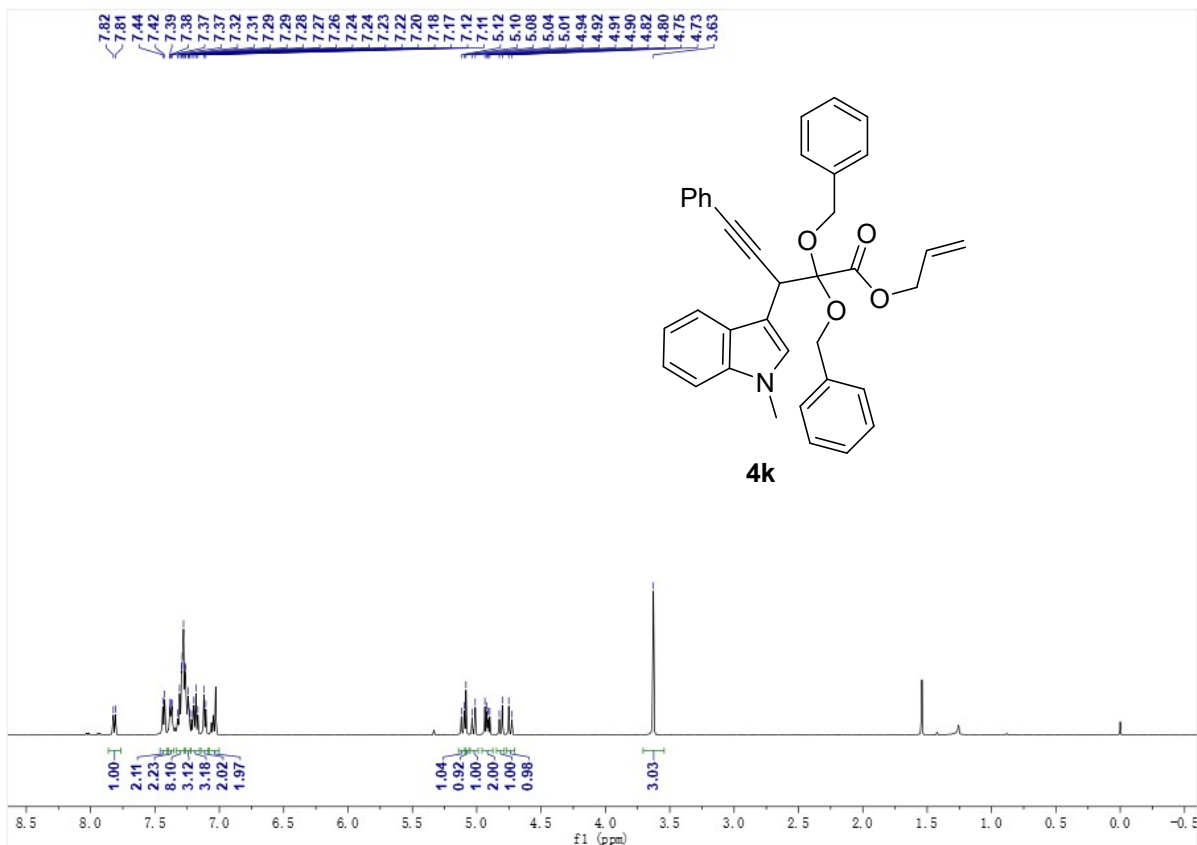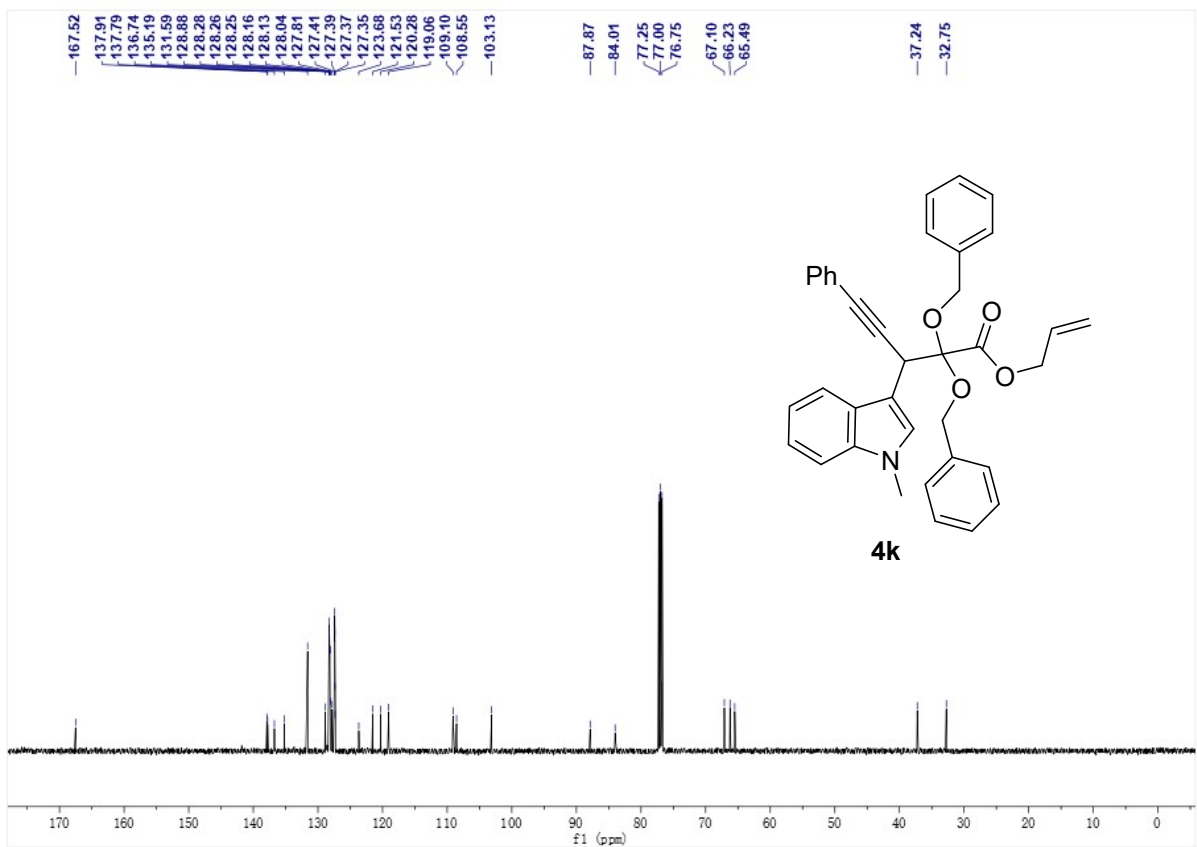

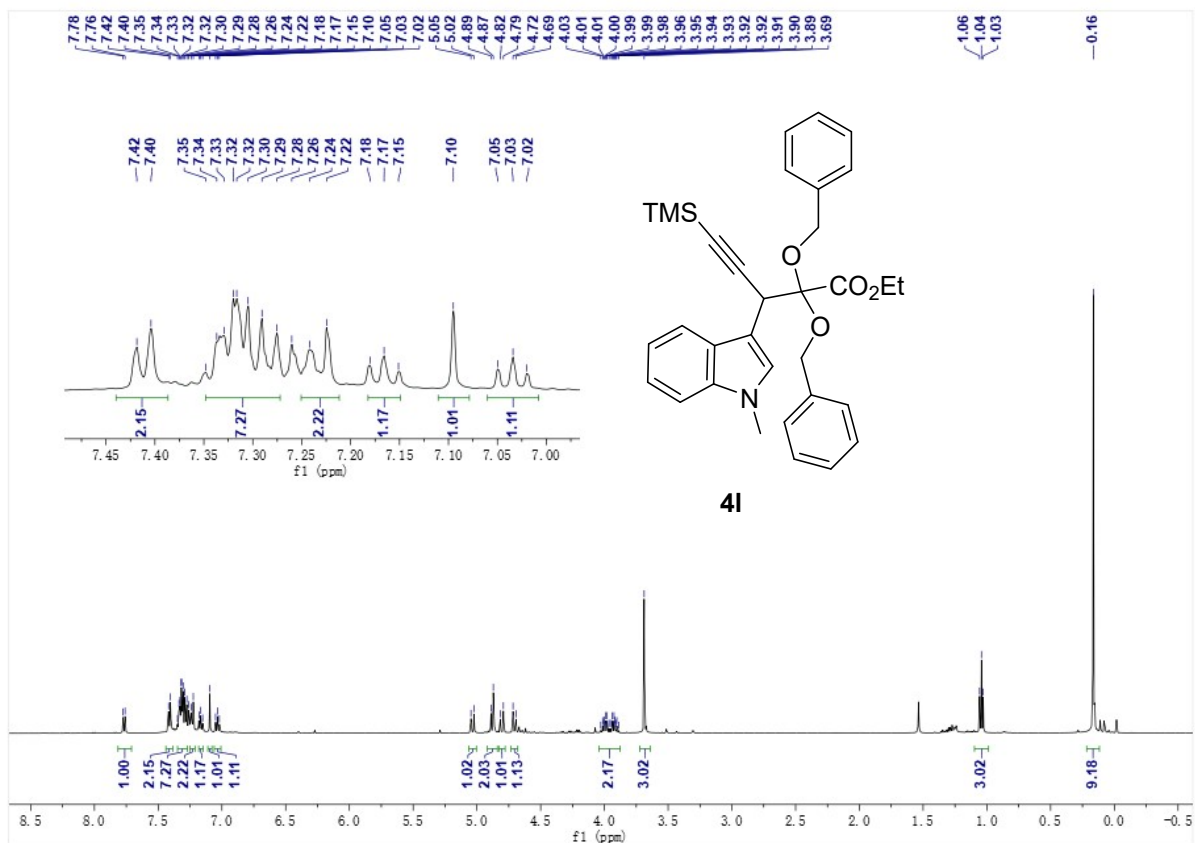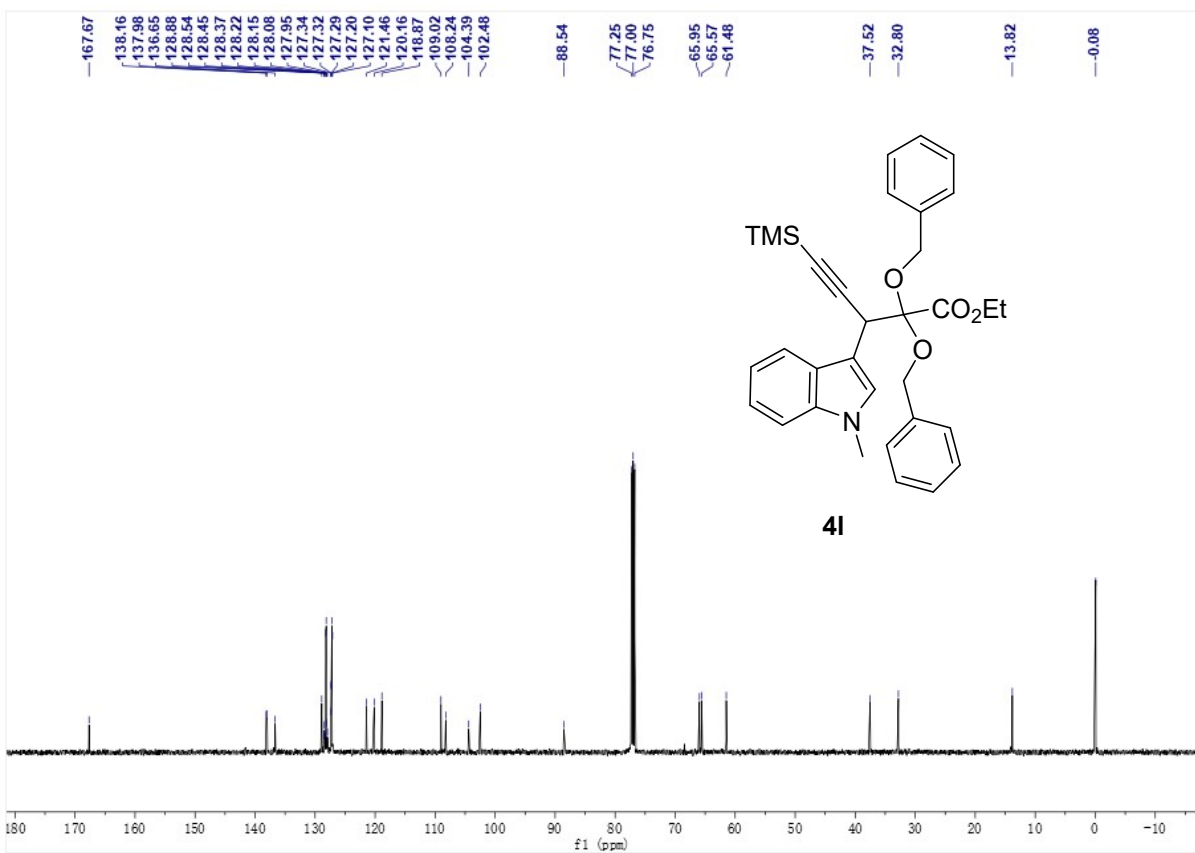

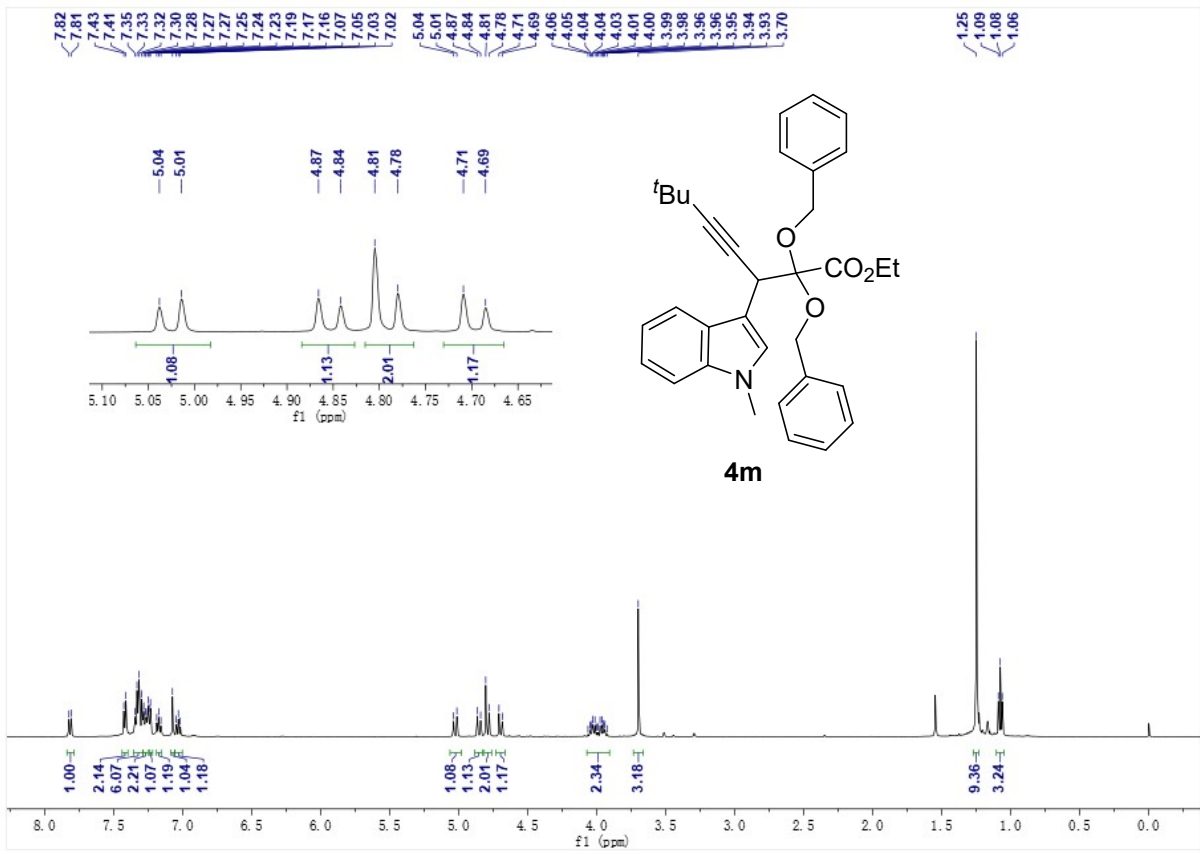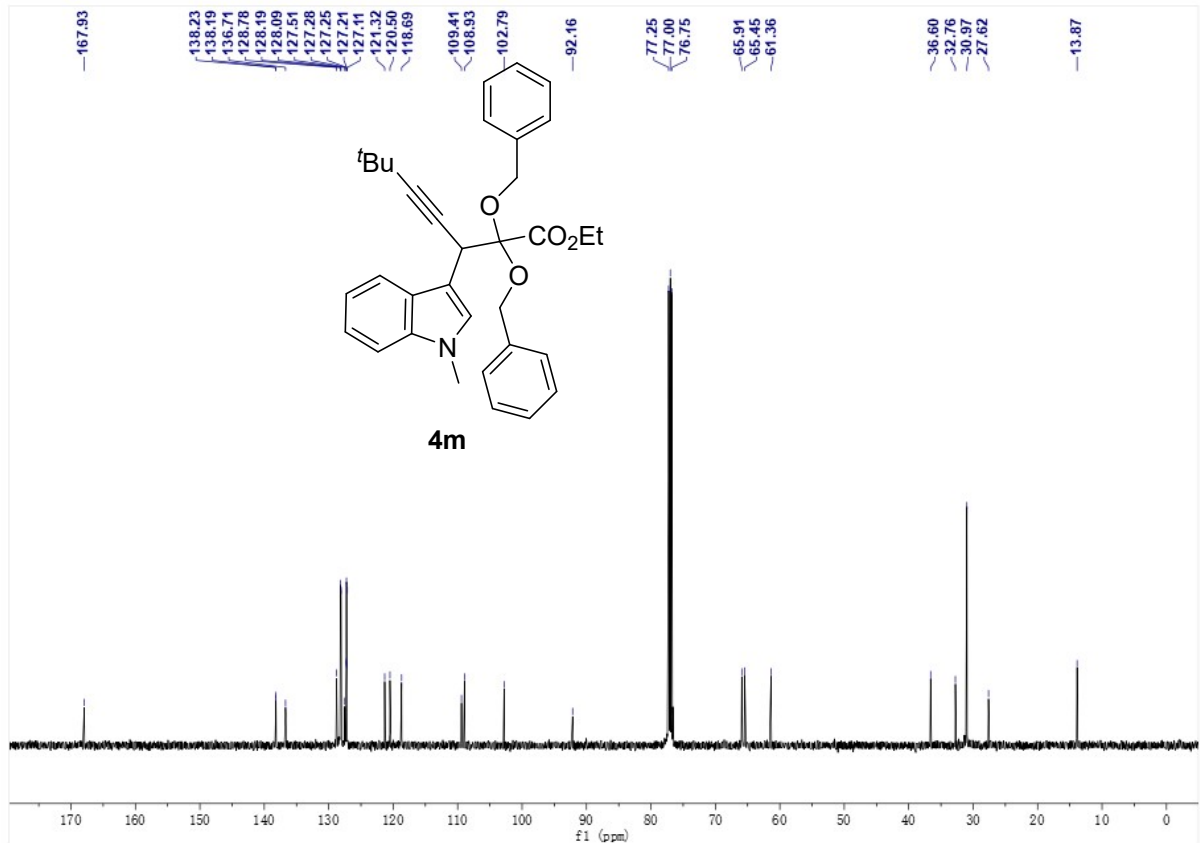

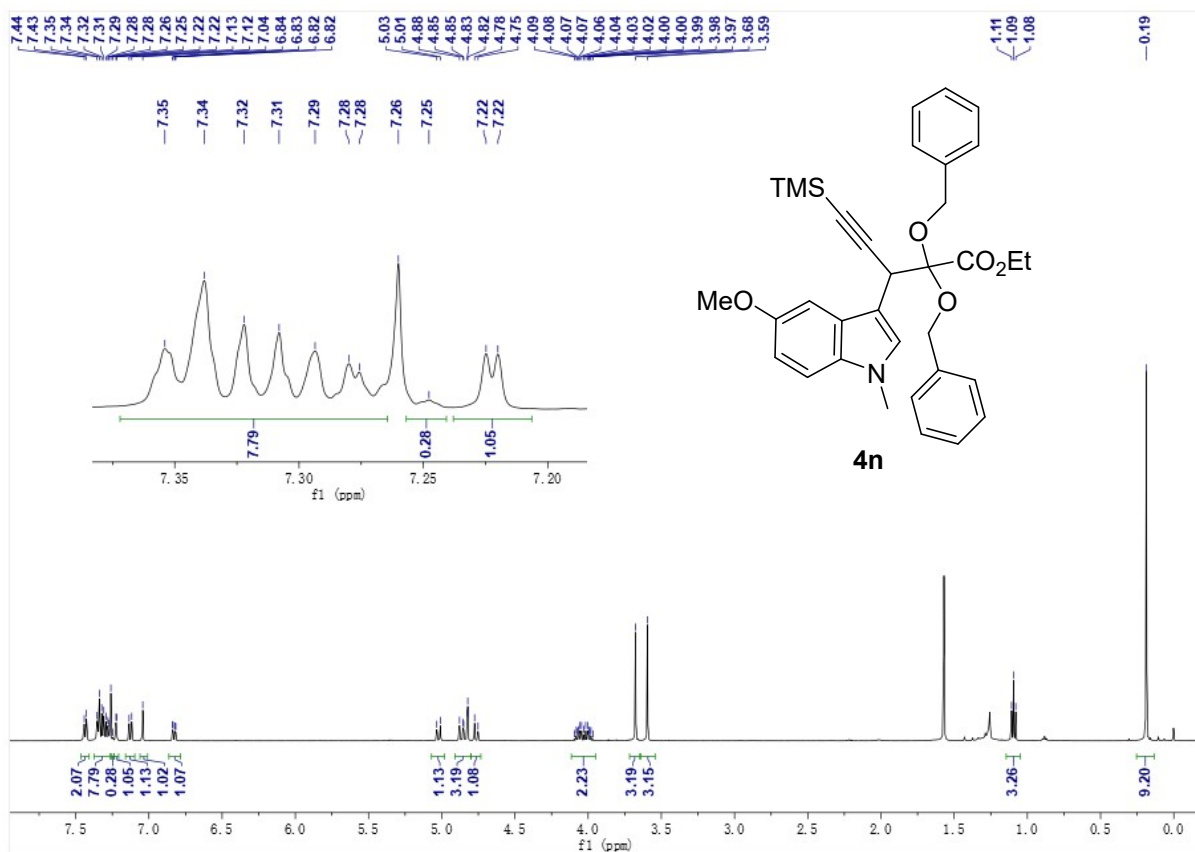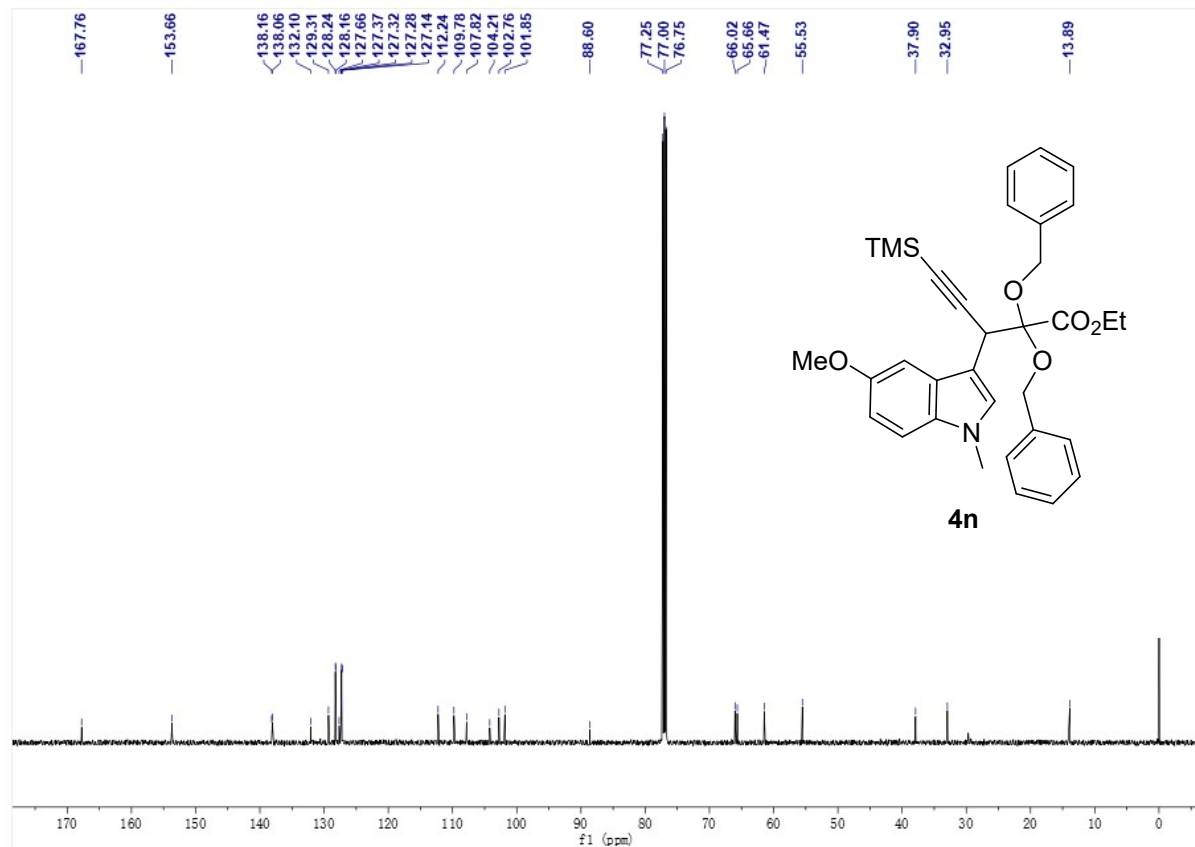

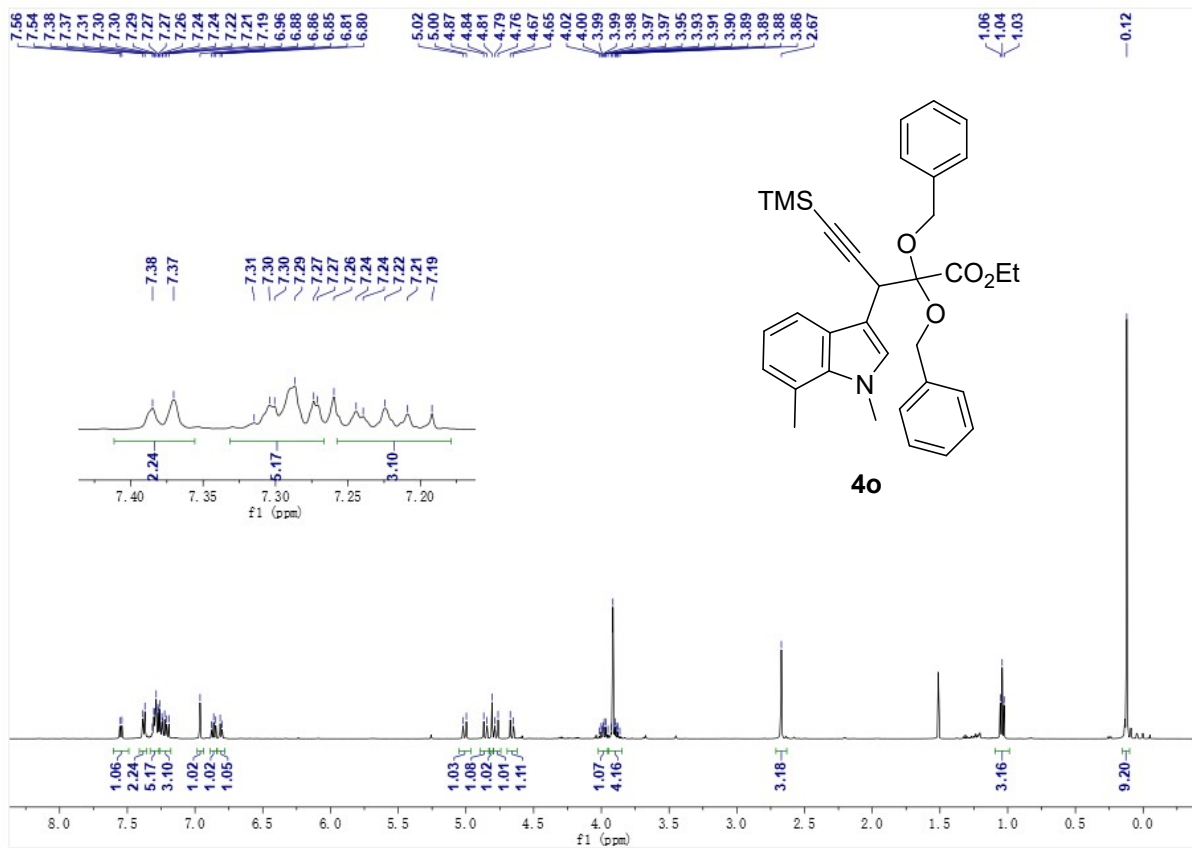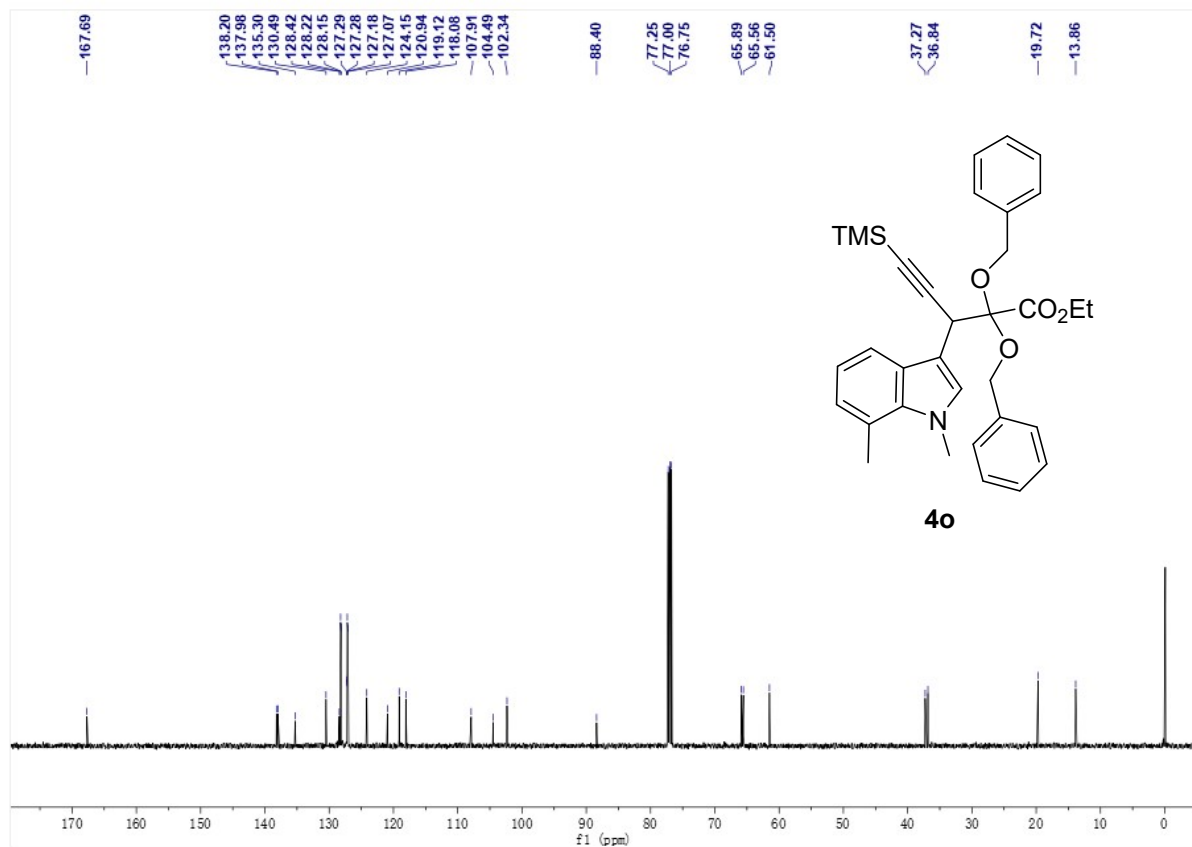



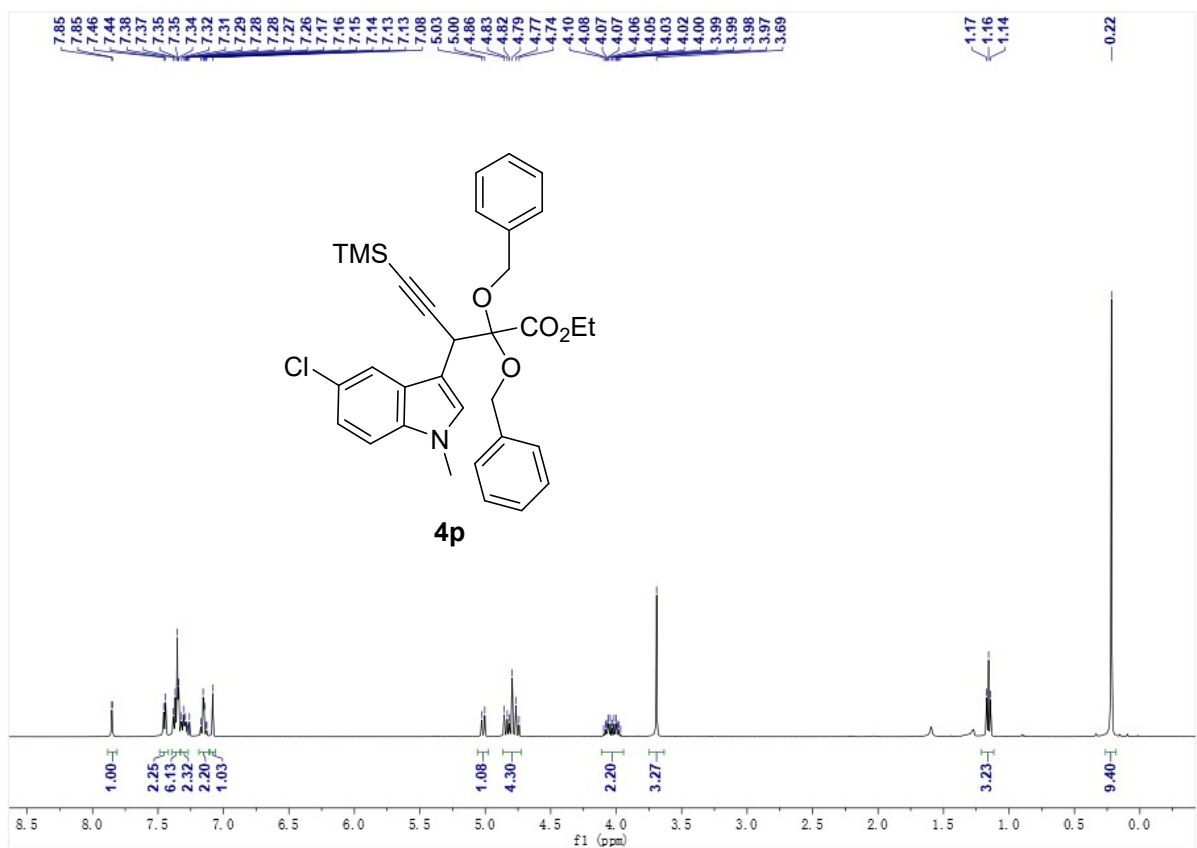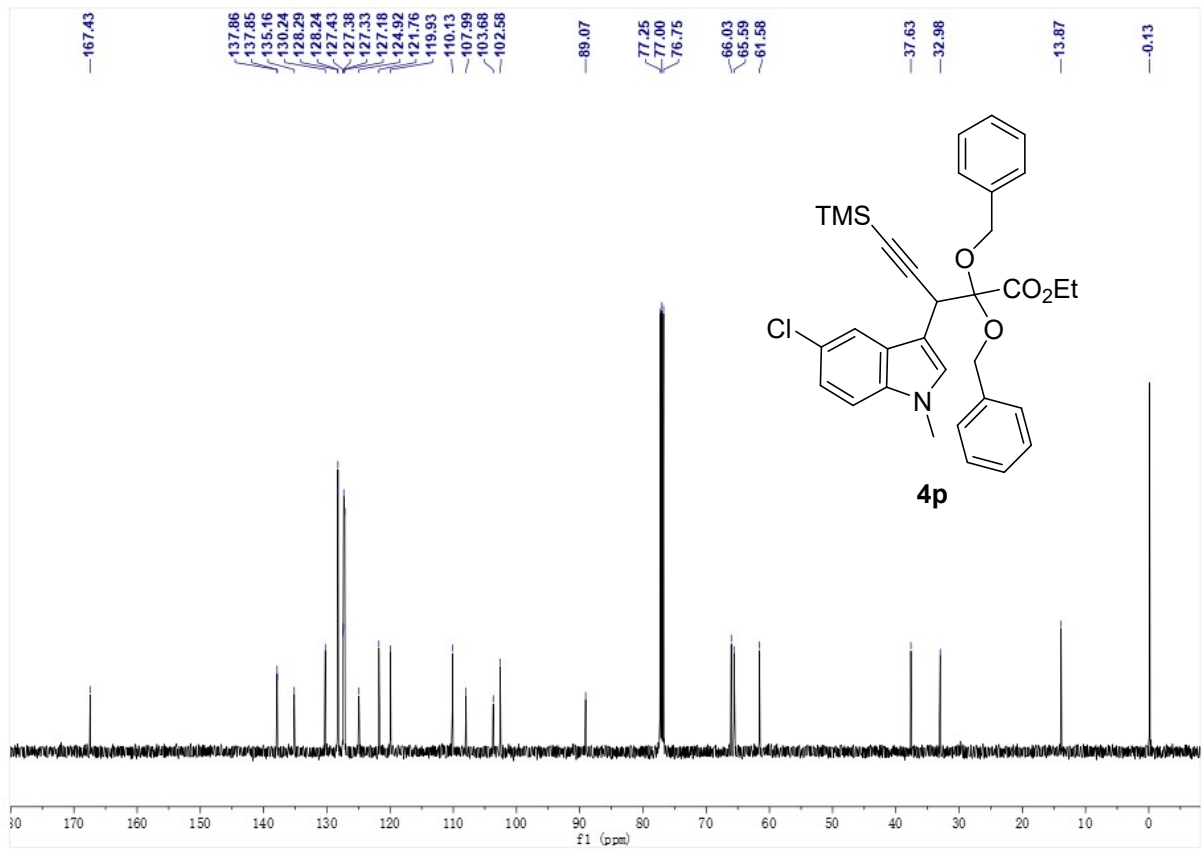

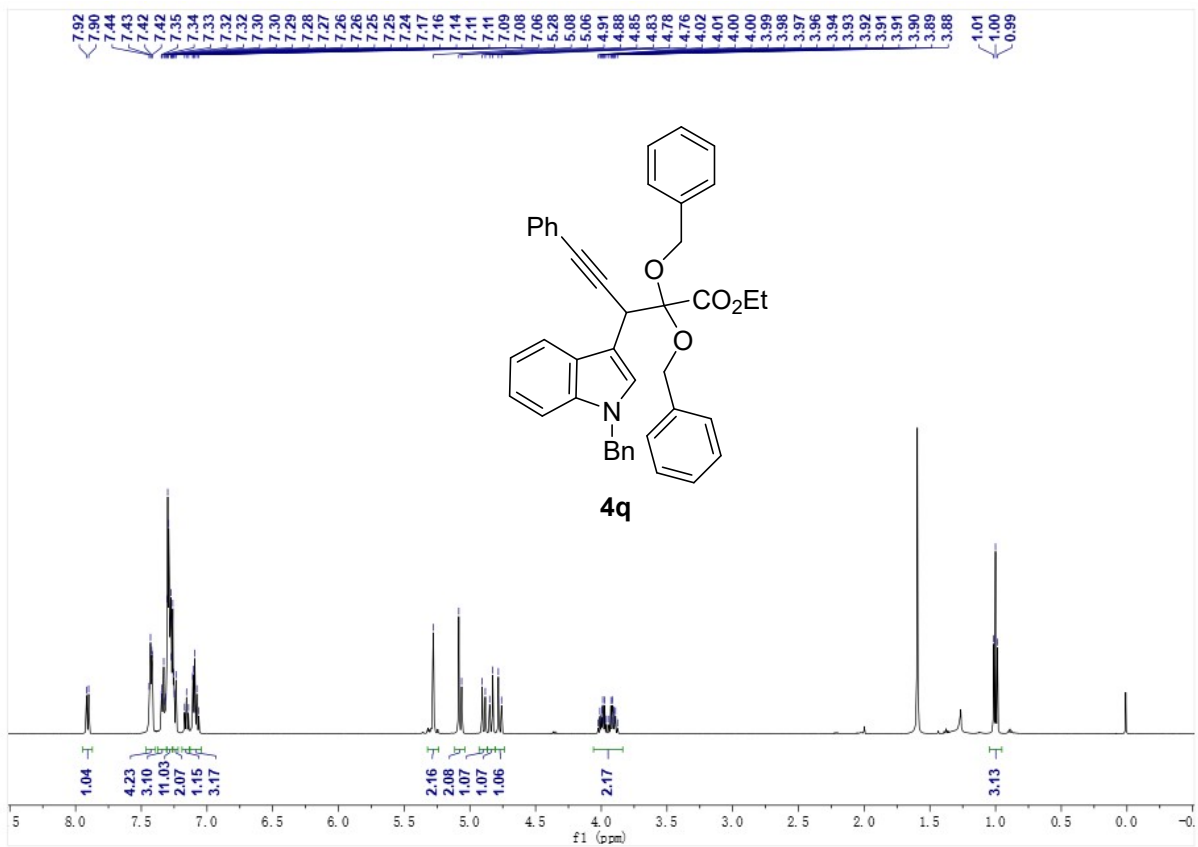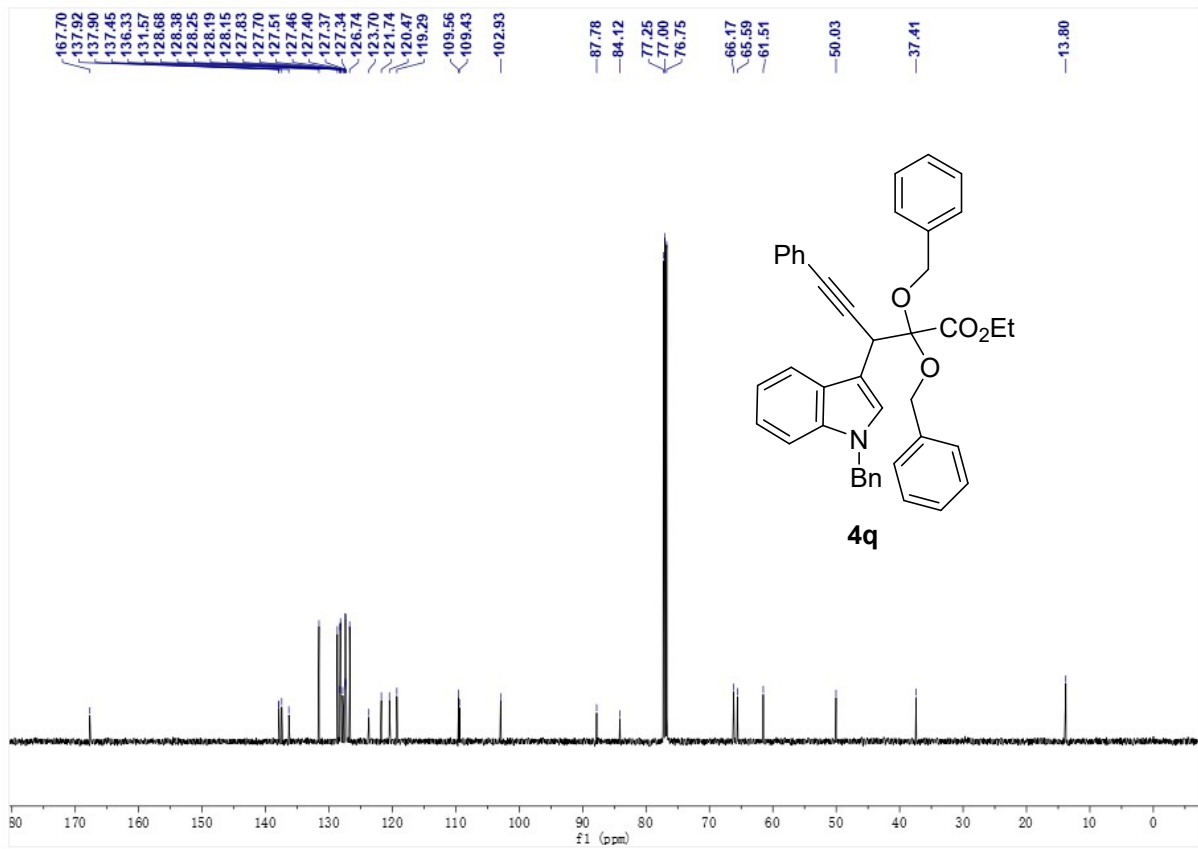

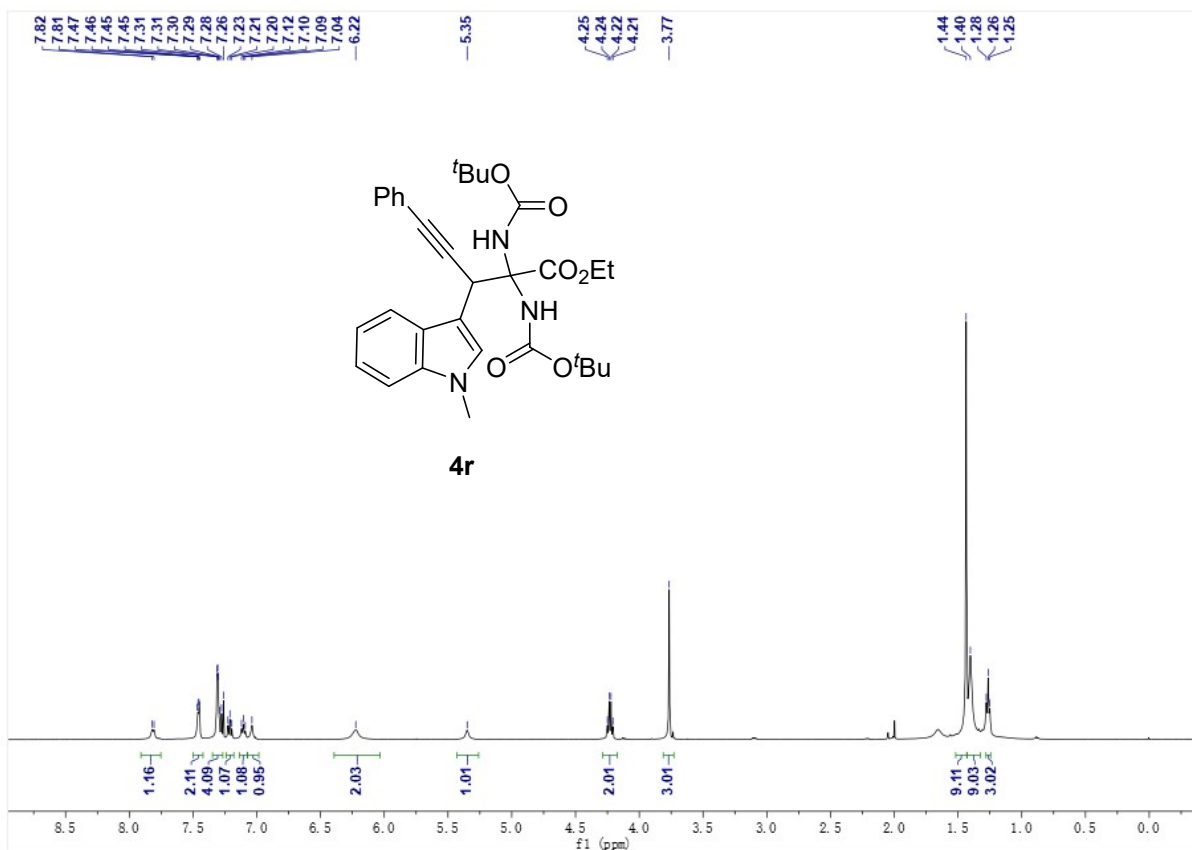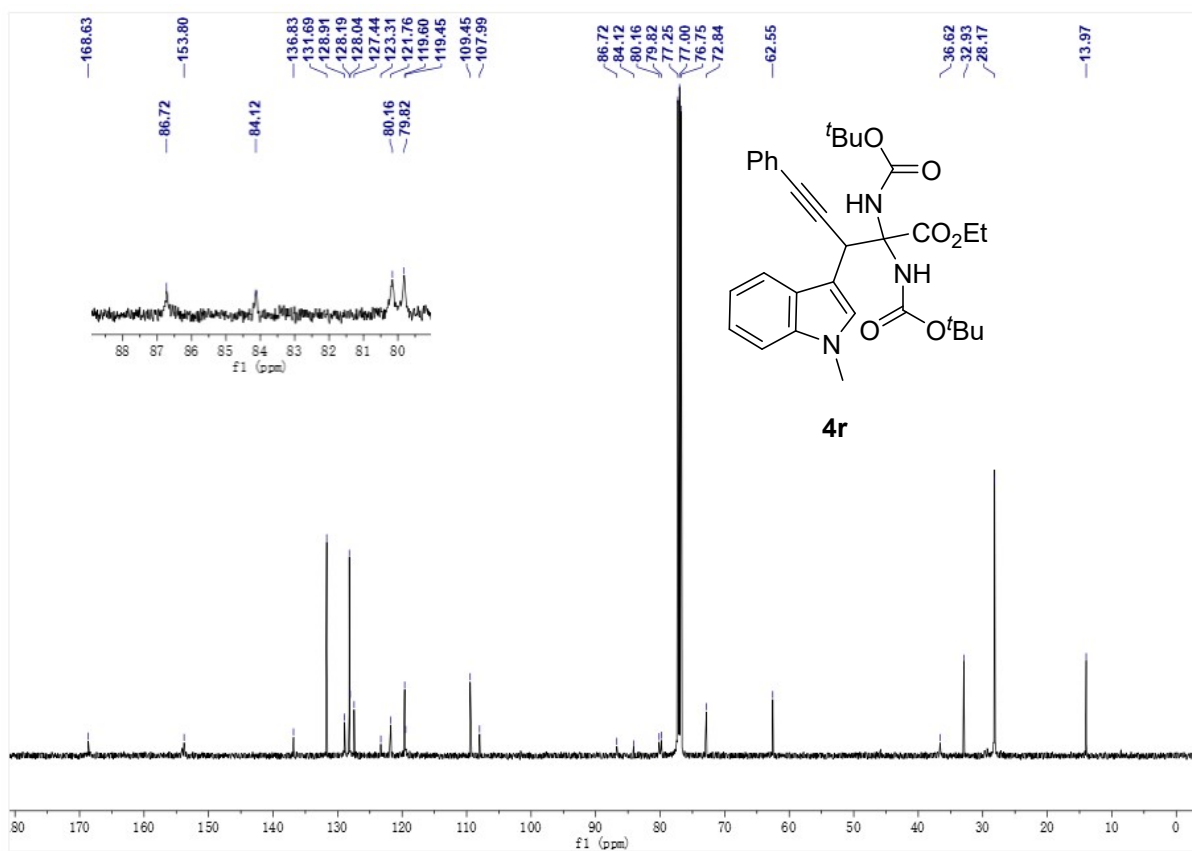

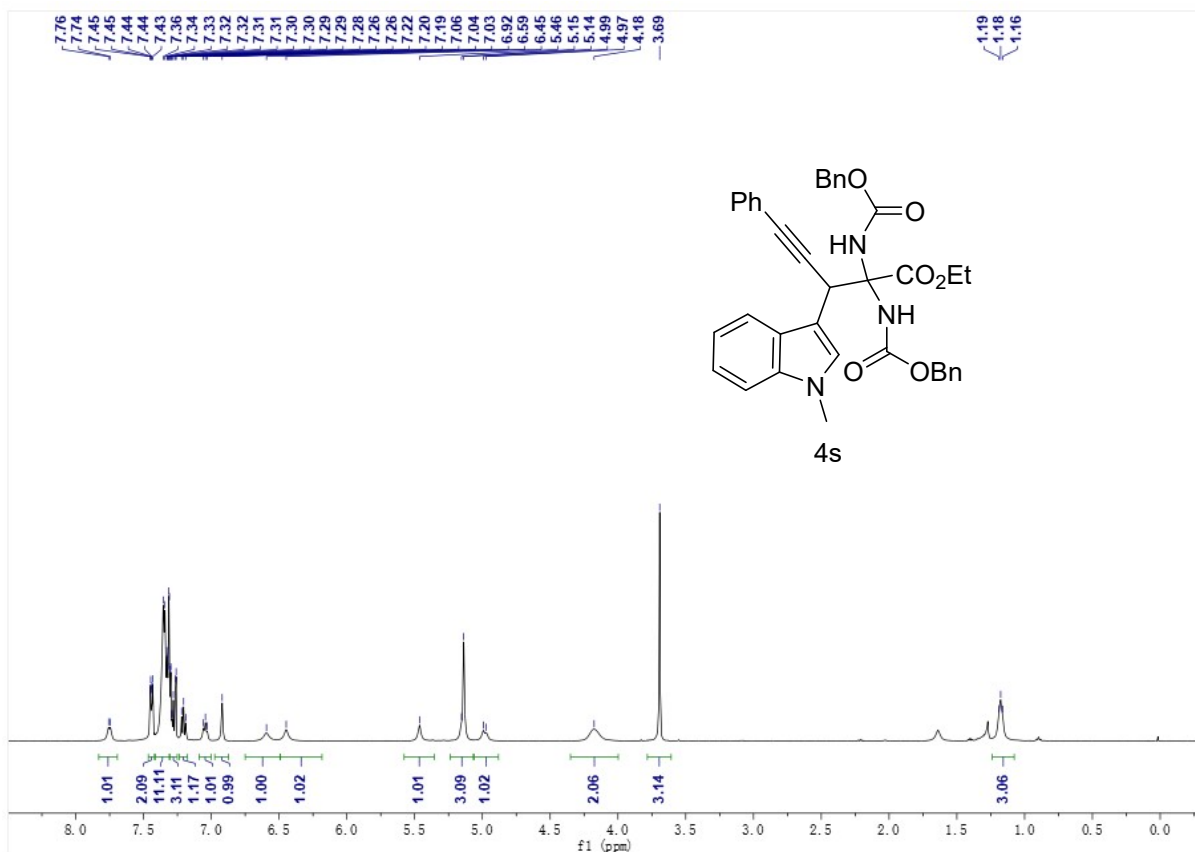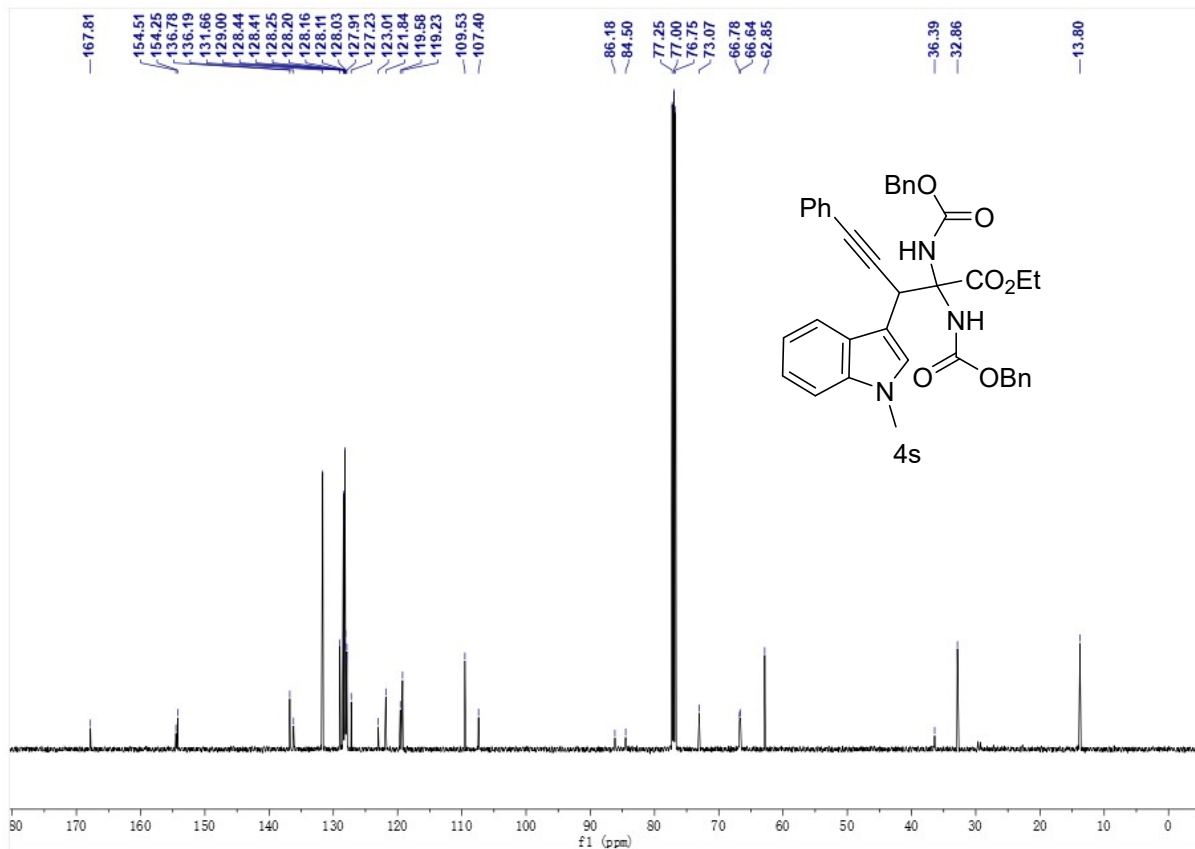

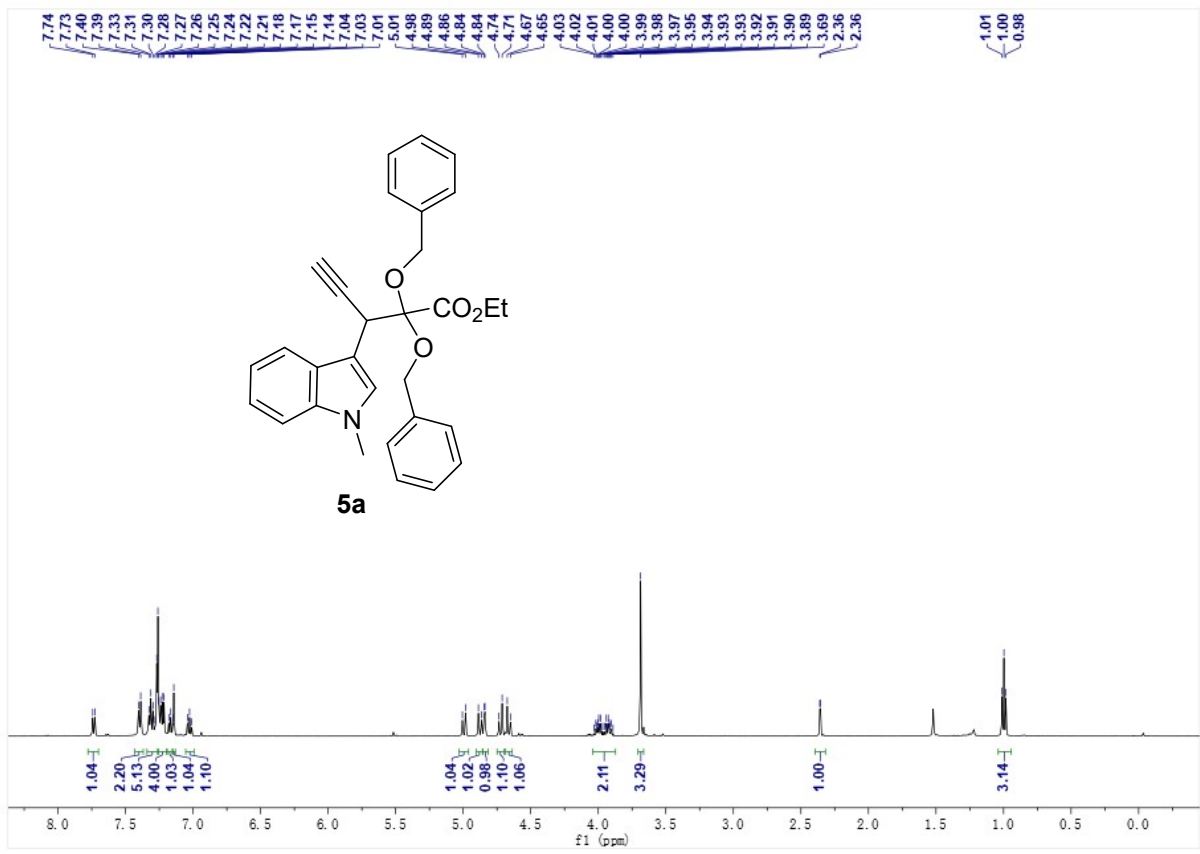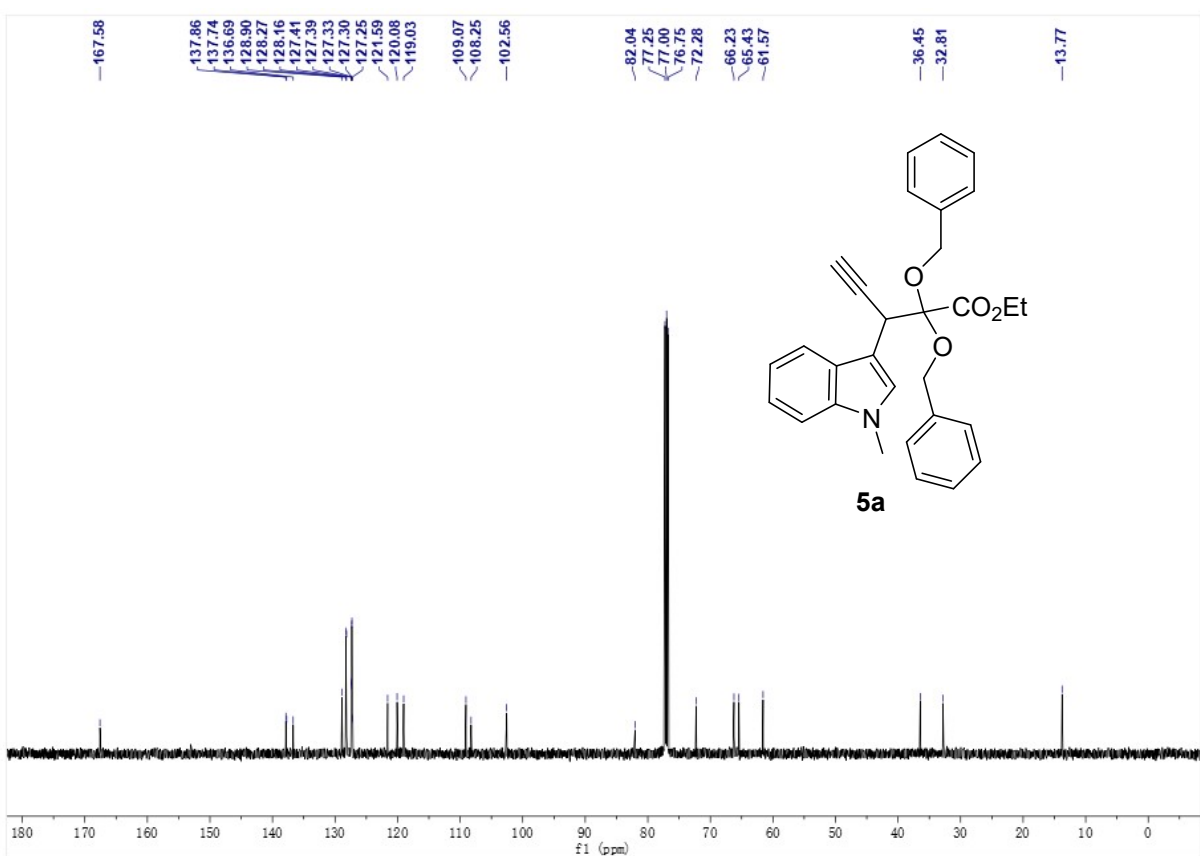

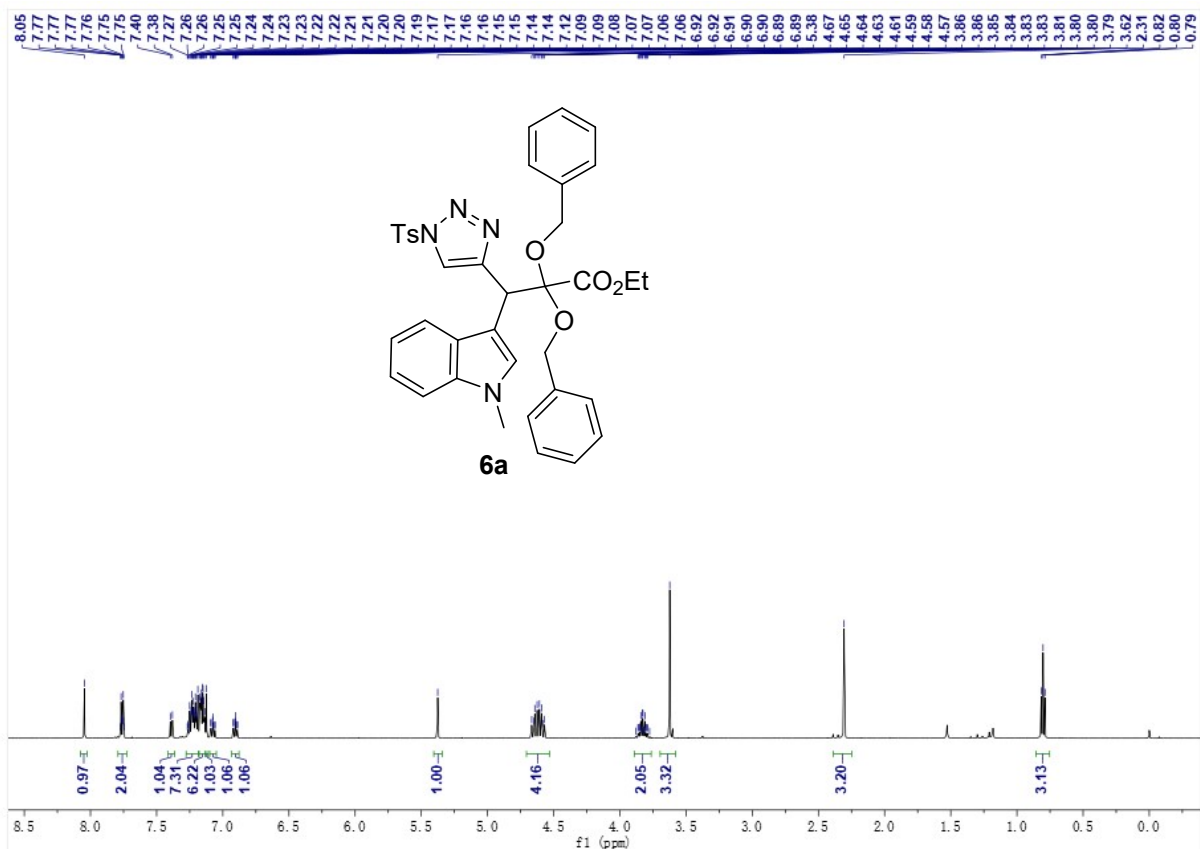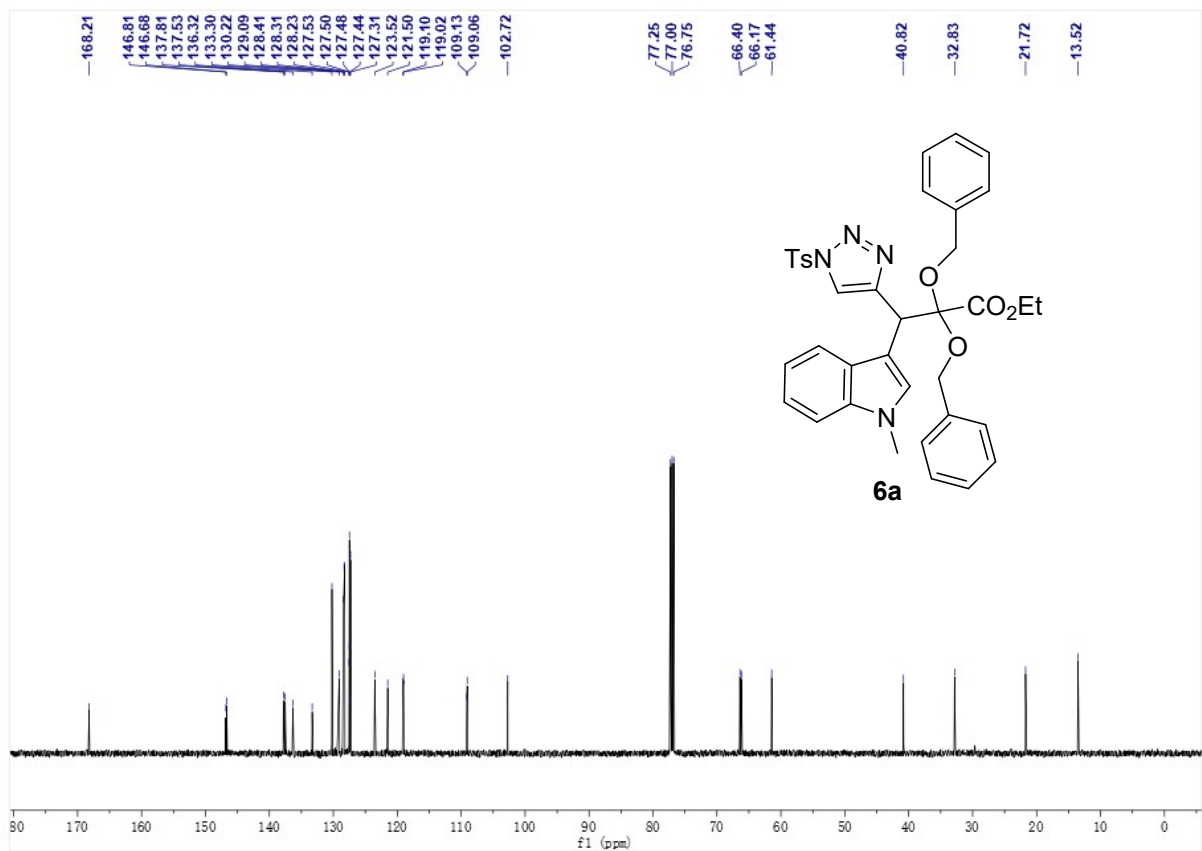

## 10. Copies of HPLC Spectra of Products 4a, 4s

HPLC chromatograms of 4a

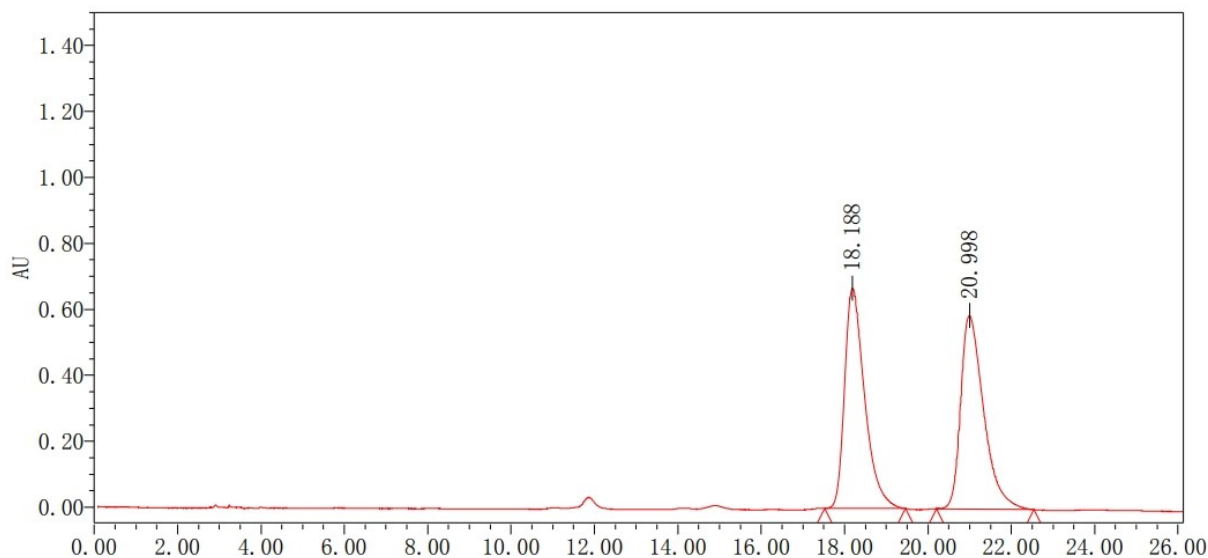

| Peak# | Retention Time /min | Area / $\mu$ AU*s | Height / $\mu$ AU | Area (%) |
|-------|---------------------|-------------------|-------------------|----------|
| 1     | 18.188              | 22430987          | 666852            | 49.99    |
| 2     | 20.998              | 22440596          | 586258            | 50.01    |

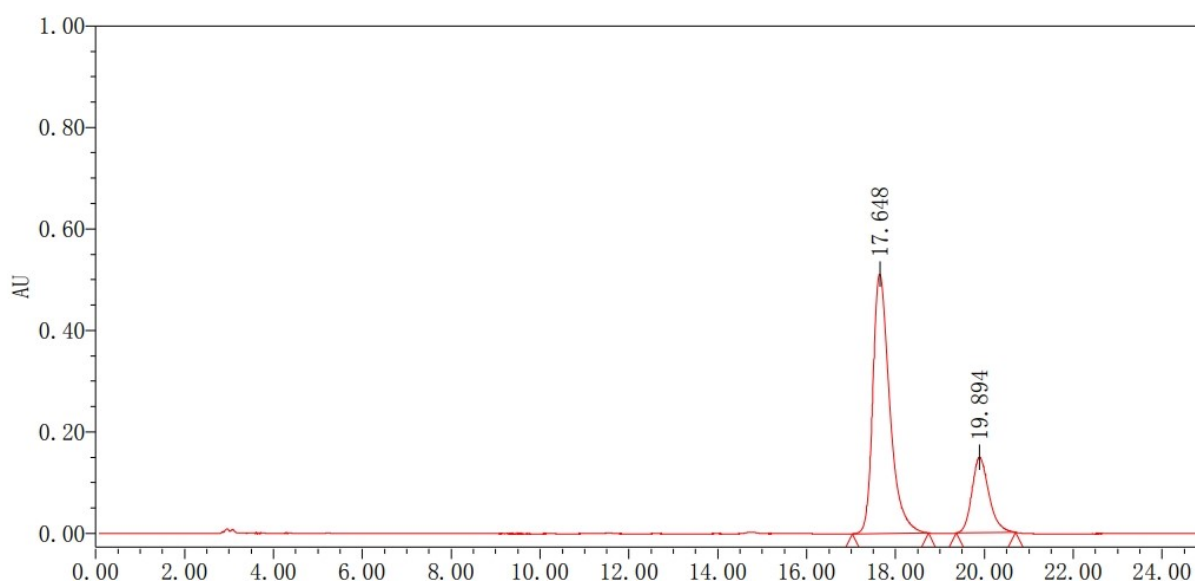

| Peak# | Retention Time /min | Area / $\mu$ AU*s | Height / $\mu$ AU | Area (%) |
|-------|---------------------|-------------------|-------------------|----------|
| 1     | 17.648              | 13442458          | 511587            | 77.05    |
| 2     | 19.894              | 4004640           | 148837            | 22.95    |

HPLC conditions for determination of enantiomeric excess: Daicel Chiralcel IA,  $\lambda = 254.0$  nm, hexane : 2-propanol = 98 : 2, flow rate = 1.0 mL/min,  $t_{\text{major}} = 17.6$  min,  $t_{\text{minor}} = 19.9$  min;

### HPLC chromatograms of 4s

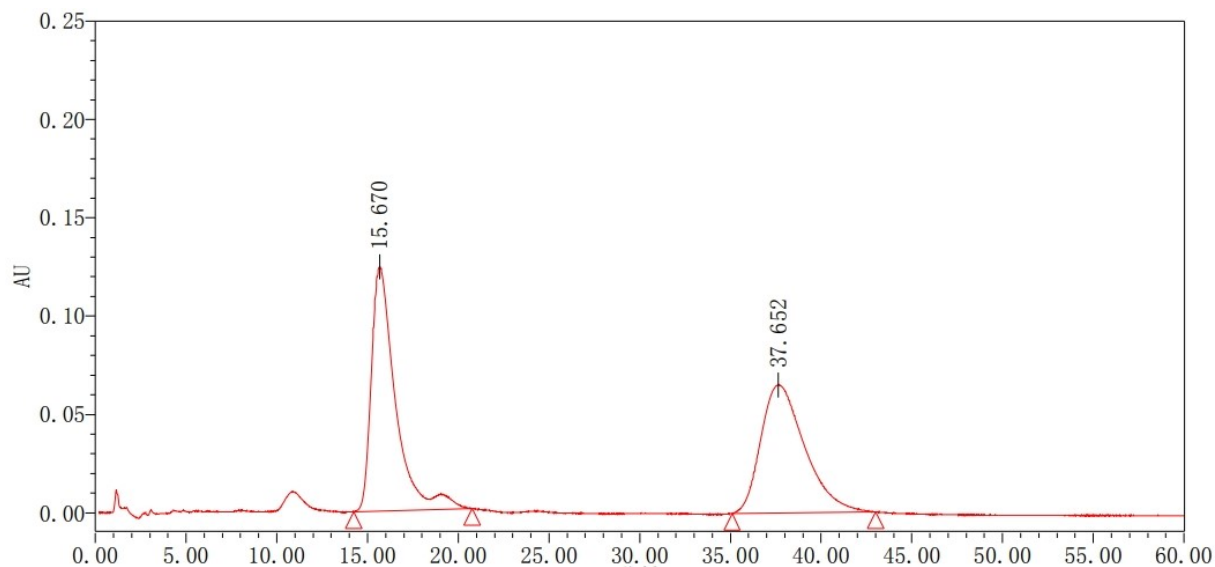

| Peak# | Retention Time /min | Area / $\mu$ AU*s | Height / $\mu$ AU | Area (%) |
|-------|---------------------|-------------------|-------------------|----------|
| 1     | 15.670              | 11526546          | 124094            | 51.36    |
| 2     | 37.652              | 10916998          | 65065             | 48.64    |

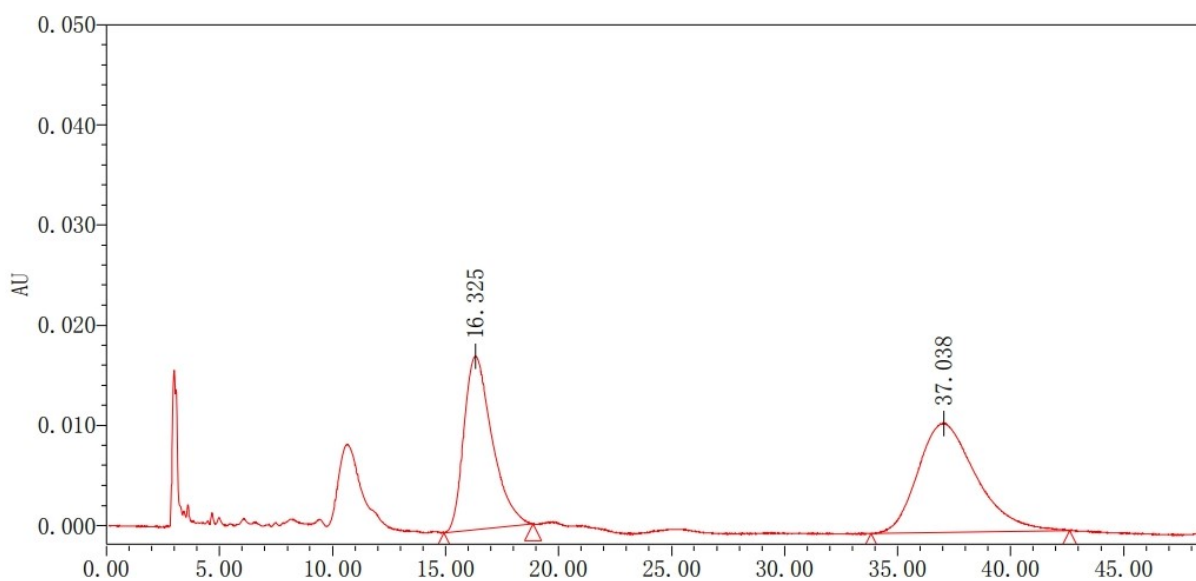

| Peak# | Retention Time /min | Area / $\mu$ AU*s | Height / $\mu$ AU | Area (%) |
|-------|---------------------|-------------------|-------------------|----------|
| 1     | 16.325              | 1505152           | 17299             | 43.53    |
| 2     | 37.038              | 1952454           | 10902             | 56.47    |

HPLC conditions for determination of enantiomeric excess: Daicel Chiralcel OD-H,  $\lambda = 254.0$  nm, hexane : 2-propanol = 80 : 20, flow rate = 1.0 mL/min,  $t_{\text{minor}} = 16.3$  min,  $t_{\text{major}} = 37.0$  min;
